1 **Origin and recent expansion of an endogenous gammaretroviral lineage in canids**

2

3 Julia V. Halo<sup>1#</sup>, Amanda L. Pendleton<sup>2</sup>, Abigail S. Jarosz<sup>1</sup>, Robert J. Gifford<sup>3</sup>, Malika L. Day<sup>1</sup>,  
4 Jeffrey M. Kidd<sup>2,4</sup>

5

6 <sup>1</sup> Halo, J.V.<sup>1#</sup>, Jarosz, A.S., Day, M.L., *Bowling Green State University, Department of Biological*  
7 *Sciences, Bowling Green, OH 43403.*

8 <sup>2</sup> Kidd, J.M., Pendleton, A.L., *University of Michigan Medical School, Department of Human*  
9 *Genetics, Ann Arbor, MI, 48109.*

10 <sup>3</sup> Gifford, R.J., *Centre for Virus Research, University of Glasgow, Glasgow, G12 8QQ Scotland.*

11 <sup>4</sup> Kidd, J.M., *University of Michigan Medical School, Department of Computational Medicine and*  
12 *Bioinformatics, 100 Washtenaw Ave., Ann Arbor, MI, 48109.*

13

14 # Correspondence should be sent:

15 Julia V. Halo, Ph.D.

16 Department of Biological Sciences

17 Bowling Green State University

18 521A Life Sciences Building

19 Bowling Green, OH 43403

20 Office phone (419) 372-4096

21 Contributing Authors' e-mail: JVH: [juliahw@bgsu.edu](mailto:juliahw@bgsu.edu); ALP: [ampend@med.umich.edu](mailto:ampend@med.umich.edu); ASJ:

22 [ajarosz@bgsu.edu](mailto:ajarosz@bgsu.edu); MLD: [mlday@bgsu.edu](mailto:mlday@bgsu.edu); JMK: [jmkidd@med.umich.edu](mailto:jmkidd@med.umich.edu); RJG:

23 [robert.gifford@glasgow.ac.uk](mailto:robert.gifford@glasgow.ac.uk)

24

25 **Keywords** (3 required)

26 Canine, retrovirus, endogenous retrovirus, insertional polymorphism, *Canidae*

27 **Abstract**

28 Mammalian genomes contain a fossilized record of ancient retroviral infections in the form of  
29 endogenous retroviruses (ERVs). We used whole genome sequence data to assess the origin  
30 and evolution of the recently active ERV-Fc gammaretroviral lineage based on the record of past  
31 infections retained in the genome of the domestic dog, *Canis lupus familiaris*. We identified 165  
32 loci, including 58 insertions absent from the dog reference assembly, and characterized element  
33 polymorphism across 332 canids from nine species. Insertions were found throughout the dog  
34 genome including within and near gene models. Analysis of 19 proviral sequences identified  
35 shared disruptive mutations indicating defective proviruses were spread via complementation.  
36 The patterns of ERV polymorphism and sequence variation indicate multiple circulating viruses  
37 infected canid ancestors within the last 20 million to within 1.6 million years with a recent burst of  
38 germline invasion in the lineage leading to wolves and dogs.

39

## 40 **Introduction**

41 During a retroviral infection, the viral genome is reverse transcribed and the resulting DNA is then  
42 integrated into the host genome as a provirus. In principle, the provirus carries all requirements  
43 necessary for its replication, and typically consists of an internal region encoding the viral genes  
44 (*gag*, *pro/pol*, and *env*) flanked by two regulatory long terminal repeats (LTRs) that are identical  
45 at the time of integration. Outermost flanking the provirus are short, 4-6 bp target site duplications  
46 (TSDs) of host genomic sequence generated during integration. Infection of such a virus within a  
47 germ cell or germ tissue may lead to an integrant that is transmitted vertically to offspring as an  
48 endogenous retrovirus (ERV). Over time, the ERV may reach detectable frequencies within a  
49 population or even fixation within a species (Boeke and Stoye, 1997). Through repeated germline  
50 invasion and expansion over millions of years, ERVs have accumulated to such an extent that  
51 they account for considerable proportions of genetic sequence of many mammalian genomes.

52 ERVs have been commonly referred to as ‘fossils’ of their once-infectious counterparts,  
53 providing a record of exogenous retroviruses that previously infected a species (Boeke and Stoye,  
54 1997). Because an ERV switches from a relatively rapid evolutionary state as an infectious virus  
55 to a relatively slow one while replicated as part of the host genome, recently formed ERVs tend  
56 to bear close resemblance to their exogenous equivalent and possess a greater potential to retain  
57 functional properties. Across species, the majority of ERVs are thought to provide no advantage  
58 to the host, and have, for the most part, been progressively degenerated over time due to  
59 accumulated mutations or from recombination between the proviral LTRs that replaces the full-  
60 length sequence with a solitary LTR, or ‘solo LTR’ (Boeke and Stoye, 1997). However, increasing  
61 evidence suggests evolutionary roles in host physiology via gene regulation, for example by  
62 providing alternative promoters, enhancers, splice sites, or termination signals (Chuong et al.,  
63 2016, Macfarlan et al., 2012, Rebollo et al., 2012). There are also instances in which ERV gene  
64 products have been co-opted for various host functions. Notable examples include syncytial  
65 trophoblast fusion in eutherian animals (Lavialle et al., 2013) and blocking of infection from  
66 exogenous viruses (Nethe et al., 2005, Stoye, 2012, Blanco-Melo et al., 2017, Weiss and Stoye,  
67 2013).

68 In humans, ERVs (HERVs) make up over 8% of the genome, the majority being the  
69 degenerate remnants of ancient infections. However, a subset of these elements is relatively  
70 intact and displays signatures of relatively recent germline invasion. Specifically, the HERV-K  
71 (HML-2) group has many young, insertionally polymorphic integrants that display variability in  
72 prevalence among global populations, retain ORFs, and includes many copies with high LTR-  
73 LTR identity (Wildschutte et al., 2016). Other species are known to harbor similar ‘young’

74 integrants resulting from relatively recent endogenization events that segregate as unfixed alleles  
75 within the species. Examples include the cervid gammaretrovirus in mule deer populations of  
76 North America (Elleder et al., 2012) and the insertionally polymorphic ERVs found in domestic  
77 and wild cats (Roca et al., 2004, Troyer et al., 2004). Other species are hosts to infection from  
78 exogenous viruses that have been shown to contribute to new germline infections, for example,  
79 the Koala retrovirus (KoRV) is in the midst of transitioning to an endogenous state in Australia  
80 (Ishida et al., 2015, Tarlinton et al., 2006, Lober et al., 2018). Recombination between distinct  
81 ERV RNAs that are co-packaged in the same virion may also contribute to new viruses that have  
82 altered pathogenic properties (Stocking and Kozak, 2008).

83         The endogenous retroviruses classified as ERV-Fc are distant relatives of extant  
84 gammaretroviruses (also referred to as gamma-like, or  $\gamma$ -like). As is typical of most ERV groups,  
85 ERV-Fc is named for its use of a primer binding site complementary to the tRNA used during  
86 reverse transcription (tRNA<sup>phe</sup>). Previous analysis of the *pol* gene showed that ERV-Fc elements  
87 form a monophyletic clade with the human  $\gamma$ -like ERV groups HERV-H and HERV-W (Jern 2005).  
88 As is common to all  $\gamma$ -like representatives, members of the ERV-Fc group possess a 'simple'  
89 genome that encodes the canonical viral genes and lacks apparent accessory genes that are  
90 present among complex retroviruses. The ERV-Fc group was first characterized as a putatively  
91 extinct, low copy number lineage that first infected the ancestor of all simians and later contributed  
92 to independent germline invasions in primate lineages (Benit et al., 2003). It has since been shown  
93 that ERV-Fc related lineages were infecting mammalian ancestors as early as 30 million years  
94 ago and subsequently circulated and spread to a diverse range of hosts, including carnivores,  
95 rodents, and primates (Diehl et al., 2016). The spread of the ERV-Fc lineage included numerous  
96 instances of cross-species jumps and recombination events between different viral lineages, now  
97 preserved in the fossil record of their respective host genomes (Diehl et al., 2016).

98         In comparison to humans and other mammals, the dog (*Canis lupus familiaris*) displays a  
99 substantially lower ERV presence, with only 0.15% of the genome recognizably of retroviral origin  
100 (Lindblad-Toh et al., 2005, Martinez Barrio et al., 2011). No exogenous retrovirus has been  
101 confirmed in the dog or any other canid, though there have been reports of retrovirus-like particles  
102 and enzyme activities in affected tissues of lymphomic and leukemic dogs (Ghernati et al., 2000,  
103 Modiano et al., 2005, Modiano et al., 1995, Onions, 1980, Perk et al., 1992, Safran et al., 1992,  
104 Tomley et al., 1983). Nonetheless, the ERV fossil record in the canine genome demonstrates that  
105 retroviruses did infect canine ancestors. The vast majority of canine ERVs (or 'CfERVs') are of  
106 ancient origin, as inferred by sequence divergence and phylogenetic placement (Martinez Barrio  
107 et al., 2011), suggesting most CfERV lineages ceased replicating long ago. An exception comes

108 from a minor subset of ERV-Fc-derived proviruses within the reference genome that possess  
109 signatures of recent integration, including high LTR nucleotide identity and the presence of ORFs  
110 (Martinez Barrio et al., 2011). This ERV lineage has been recently detailed by Diehl, *et al.*, in  
111 which the authors described a distinct ERV-Fc lineage in the Caniformia suborder (Figure 1)  
112 classified therein as ‘ERV-Fc1’ (Diehl et al., 2016). The ERV-Fc1 lineage first spread to members  
113 of the Caniformia at least 20 million years ago (mya) as a recombinant virus of two otherwise  
114 distantly related  $\gamma$ -like lineages: the virus possessed ERV-Fc *gag*, *pol*, and LTR segments but had  
115 acquired an *env* gene most closely related to ERV-W (syncytin-like) (Diehl et al., 2016). A derived  
116 sublineage, CfERV-Fc1(a), later spread to and infected canid ancestors via a cross-species  
117 transmission from an unidentified source, after which the lineage remained active/mobile and  
118 endogenized canid members until at least the last 1-2 million years (Diehl et al., 2016).  
119 Phylogenetic analyses confirmed the few recently inserted loci belong to CfERV-Fc1(a) (Diehl et  
120 al., 2016).

121 The domestic dog belongs to the family *Canidae*, the oldest family of Carnivora, which  
122 arose in North America during the late Eocene (~46 mya) (Macdonald and Sillero-Zubiri, 2004,  
123 Kumar et al., 2017) (Figure 1). Following multiple crossings of the Bering Strait land bridge to  
124 Eurasia, canids underwent massive radiations, leading to the ancestors of most modern canids  
125 (Macdonald and Sillero-Zubiri, 2004). The now extinct progenitors of the wolf-like canids,  
126 belonging to the genus *Canis*, first appeared in North America ~6 mya and also entered Eurasia  
127 via the same route (Macdonald and Sillero-Zubiri, 2004). Slowly, canids colonized all continents  
128 excluding Antarctica, as the formation of the Isthmus of Panama permitted dispersal and  
129 radiations within South America starting around 3 mya (Macdonald and Sillero-Zubiri, 2004).  
130 Approximately 1.1 mya, *Canis lupus*, the direct ancestor of the dog, emerged in Eurasia (Koepfli  
131 et al., 2015). Along with many other canid species, the gray wolf migrated back to the New World  
132 during the Pleistocene when the land bridge formed once more (Macdonald and Sillero-Zubiri,  
133 2004). Placed within the context of CfERV-Fc1(a) evolution, the initial insertions from this lineage  
134 would have occurred while early *Canidae* members were still in North America, and continued  
135 until the emergence of the gray wolf.

136 Utilizing genome data from canid species representing all four modern lineages of  
137 *Canidae* (Figure 1), we assessed the origin, evolution, and impact of the recently active  $\gamma$ -like  
138 CfERV-Fc1(a) lineage, yielding the most comprehensive assessment of ERV activity in carnivores  
139 to date. Aside from analyses utilizing the current dog reference assembly (CanFam3.1), relatively  
140 little is known in this regard. We used Illumina sequence data to characterize CfERV-Fc1(a)  
141 integrants in dogs and wild canids, resulting in the discoveries of numerous insertionally

142 polymorphic and novel copies and the further delineation of the presence of this ERV group by  
143 comparison of orthologous insertions across species to provide a rich evolutionary history of  
144 CfERV-Fc1(a) activity among the *Canidae*. Our analysis demonstrates that the spread of CfERV-  
145 Fc1(a) contributed to numerous germline invasions in the ancestors of modern canids, including  
146 proviruses with apparently intact ORFs and other signatures of recent integration. The data  
147 suggest mobilization of existing ERVs by complementation had a significant role in the  
148 proliferation of the CfERV-Fc1(a) lineage in canine ancestors.

149

## 150 **Results**

### 151 **Discovery of CfERV-Fc1(a) insertions**

#### 152 ***Insertionally polymorphic CfERV-Fc1(a) loci in dogs and wild canids***

153 We determined the presence of CfERV-Fc1(a) insertions using Illumina whole genome  
154 sequencing data from dogs and other *Canis* representatives in two ways (Figure 2). First, we  
155 searched for CfERV-Fc1(a) sequences in the dog reference genome that were polymorphic  
156 across a collection of resequenced canines. In total, our dataset contained 136 CfERV-Fc1(a)  
157 insertions, and was filtered to a curated set of 107 intact or near-intact loci, including two loci  
158 related by segmental duplication (see Methods). These insertions are referred to as ‘reference’  
159 throughout the text due to their presence in the dog reference genome. Comparative BLAT  
160 searches demonstrated their absence from the draft genomes of other extant Caniformia species  
161 (*i.e.*, ferret and panda). We then intersected the reference loci with deletions predicted by Delly  
162 (Rausch et al., 2012) within a sample set of 101 resequenced *Canis* individuals, specifically  
163 including jackals, coyotes, gray wolves, and dogs (Table S1). Candidate deletions were classified  
164 as those that intersected with annotated ‘CfERV1’-related loci and were within the size range of  
165 the solo LTR or provirus (~457 and ~7,885 bp, respectively; Figure 2A). The analysis identified  
166 11 unfixated reference insertions, including 10 solo LTRs and one full-length provirus.

167 Our second approach utilized aberrantly mapped read-pairs from the same set of 101  
168 genomes to identify CfERV-Fc1(a) copies that are absent from the dog reference genome. We  
169 refer to such insertions as ‘non-reference’. These sites were identified using a combined read  
170 mapping and *de novo* assembly approach previously used to characterize polymorphic  
171 retroelement insertions in humans (Wildschutte et al., 2015, Wildschutte et al., 2016) (Figure 2B;  
172 also see Methods). This process identified 58 unique non-reference insertions, all of which  
173 derived from ‘CfERV1’-related elements per RepeatMasker analysis. Twenty-six of the 58  
174 assembled insertion loci were fully resolved as solo LTRs, 30 had non-resolved but linked 5’ and  
175 3’ genome-LTR junctions, and two had one clear assembled 5’ or 3’ LTR junction. Due to the one-

176 sided nature of assembled reads, we note the latter two were excluded from the majority of  
177 subsequent analyses (also see Figure S1 and Table S2). The assembled flanking regions and  
178 TSDs of each insertion were unique, implying each was the result of an independent germline  
179 invasion. Together, our two approaches for discovery resulted in 69 candidate polymorphic  
180 CfERV-Fc1(a)-related elements.

181

### 182 ***Validation of allele presence and accuracy of read assembly***

183 We initially surveyed a panel of genomic DNA samples from breed dogs to confirm the  
184 polymorphic status of a subset of insertions (Figure 3). We then confirmed the presence of as  
185 many of the identified non-reference insertions as possible (34/58 sites) in predicted carriers from  
186 the 101 samples, and performed additional screening of each site to discriminate solo LTR and  
187 full-length integrants (Table S2). We confirmed a non-reference insertion for each of the 34 sites  
188 for which DNA from a predicted carrier was available. A provirus was present at eight of these  
189 loci, both insertion alleles were detected at three loci, and a solo LTR was present for the  
190 remaining loci. The full nucleotide sequence was obtained for 33 of the 34 insertions, with  
191 preference for sequencing placed on the provirus allele when present. The provirus at the final  
192 site (chr5:78,331,579) could not be completely spanned due to the presence of highly repetitive  
193 sequence within the *gag* gene (~2,250 bp from the consensus start). We also confirmed the  
194 polymorphic nature of the 11 reference CfERV-Fc1(a) insertions predicted to be unfixated, however  
195 we did not detect variable insertion states for those sites.

196 We assessed the accuracy of read assembly by comparing the assembled alleles to  
197 Sanger reads obtained for the validated sites. Due to the inability of the Illumina reads to span a  
198 full-length provirus, we were limited to the evaluation of fully assembled solo LTRs. Base  
199 substitutions were observed for just two assembled non-reference loci. First, the assembled  
200 chr13:17,413,419 solo LTR had a predicted base change between its TSDs that was resolved in  
201 Sanger reads; all other validated TSDs were in agreement as 5 bp matches, as is typical of the  
202 lineage. Second, the chr16:6,873,790 solo LTR had a single change in the LTR relative to the  
203 assembled allele. All other validated loci were in complete agreement with predictions obtained  
204 by read assembly of those insertions.

205 Structural variants between assembled sequences and the reference genome were also  
206 observed. For example, the assembled contig at chr33:29,595,068 captured a deletion of a  
207 reference SINE insertion 84 bp downstream of the non-reference solo LTR (Figure 4A). Deletion  
208 of the reference SINE was also supported by Delly deletion calls using the same Illumina data.  
209 Sanger sequencing confirmed a 34 bp deletion in an assembled insertion situated within a TA<sub>(n)</sub>

210 simple repeat near chr32:7,493,322 (Figure 4B). Finally, an assembled solo LTR that mapped to  
211 chr2:32,863,024 contained an apparent 8 bp extension from the canonical CfERV1 Repbase  
212 LTR of its 3' junction (5' TTTTAAACA 3'). We validated the presence of the additional sequence  
213 within matched TSDs flanking the LTR and confirmed its absence from the empty allele (Figure  
214 4C). The extension is similar in sequence to the consensus CfERV1 LTR (5' ACTTAAACA 3') and  
215 maintains the canonical 3' CA sequence necessary for proviral integration. These properties  
216 support its presence as part of the LTR, possibly generated during reverse transcription or during  
217 post-integration sequence exchange.

218

### 219 ***The CfERV-Fc1(a) genomic landscape***

220 In principle, upon integration a provirus contains the necessary regulatory sequences for its own  
221 transcription within its LTRs; solo LTR recombinants likewise retain the same regulatory ability.  
222 Indeed, ERVs have been shown to affect regulatory functions within the host and some have been  
223 exapted for functions in normal mammalian physiology (reviewed in (Jern and Coffin, 2008)). A  
224 previous analysis of the then-current CanFam2.0 reference build identified at least five  $\gamma$ -like  
225 ERVs within or near genes from proviruses that belonged to a distinct and older non-Fc1(a)  
226 sublineage (specifically the 'CfERV1z' ERV-P related group, per RepeatMasker) (Martinez Barrio  
227 et al., 2011). Given the discovery of numerous novel insertions in our study and the improved  
228 annotation of the CanFam3.1 reference assembly, we assessed CfERV-Fc1(a) presence in  
229 relation to dog gene models.

230 Genome-wide insertion patterns were assessed for 58 non-reference and all 107  
231 reference CfERV-Fc1(a) insertions. Of the 165 insertions, 29 (17.6%) were present within the  
232 introns of Ensembl gene models while one exonic reference insertion was identified (Table S3).  
233 Nine of the genic insertions (30%) were in sense orientation in respect to the gene. Some  
234 insertions were also in the vicinity of genes. For example, thirteen additional Fc1 loci were within  
235 5 kb of at least one dog gene model; four of seven insertions situated upstream of the nearest  
236 gene were in sense orientation. Another 15 Fc1 loci were within 10 kb of at least one gene, of  
237 which seven of ten upstream insertions were in sense orientation with respect to the nearest gene.  
238 ERV-related promoter and enhancer involvement has been reported for distances exceeding 50  
239 kb both upstream and downstream of genes (for example, see (Maruggi et al., 2009)). We find  
240 that 96 (58.2%) of assessed CfERV-Fc1(a) elements are within 50 kb of a gene model. Compared  
241 with randomized placements, CfERV-Fc1(a) insertions are significantly depleted within genes ( $p$   
242  $< 0.001$ ) and within 10 kb of genes ( $p < 0.001$ ). However, no significant difference was observed  
243 at the 50 kb distance (Figure S2). Insertions were present on all chromosomes except chr35 and



244 the Y chromosome, which is incomplete and not part of the canonical CanFam3.1 assembly.  
245 Individual CfERV-Fc1(a) insertions have been annotated with gene identifiers, gene ontology  
246 terms, and distances to nearest gene(s) in Table S3.

247

## 248 **Age and evolutionary relationship of CfERV-Fc1(a) insertions**

### 249 ***Dating proviral integrants by LTR divergence***

250 Nucleotide divergence between the 5' and 3' LTRs of a provirus has been commonly used to  
251 estimate the time since endogenization, assuming that ERV sequences evolve neutrally following  
252 integration (Johnson and Coffin, 1999, Hughes and Coffin, 2004). Using this dating method, we  
253 estimated broad formation times of CfERV-Fc1(a) proviruses that maintained both LTRs. This  
254 analysis excluded three truncated reference elements (chr1:48,699,324, chr8:73,924,489, and  
255 chrUnAAEX03024336:1) and one non-reference provirus with an internal 291 bp deletion of the  
256 3' LTR (chr17:9,744,973). The 3' LTR of the chr33:22,146,581 non-reference insertion contained  
257 a 43 bp internal duplication, which we treated as a single change. We applied a host genome-  
258 wide dog neutral substitution rate of  $1.33 \times 10^{-9}$  changes per site per year (Botigue et al., 2017),  
259 yielding formation times of individual proviruses from 20.49 mya to within 1.64 mya.

260 These estimates are sensitive to the assumed mutation rate, in addition to the limited  
261 number of differences expected between LTRs for the youngest loci. Obtaining age estimates in  
262 this manner for the youngest proviruses (as assumed by high 5' and 3' LTR identity) is dependent  
263 on the time to accrue a single mutation between the LTRs (of ~457 bp in length). The youngest  
264 estimate (1.64 my) is driven by two proviruses whose LTRs differ by a single base change and  
265 five proviruses with identical 5' and 3' LTRs, although the inter-element LTR haplotype sequence  
266 differed between proviruses. Across these five proviruses, LTR identities ranged from 98.5% to  
267 99.4% (average of 98.95%), with a total of five LTR pairs that shared private substitutions. The  
268 remaining provirus shared an average identity of 85.45% to the other four. We further identified  
269 solo LTRs with sequence identical to one of two respective proviral LTR haplotypes  
270 (chr3:82,194,219 and chr4:22,610,555; also see below), suggesting multiple germline invasions  
271 from related variants. These data are consistent with insertion of CfERV-Fc1(a) members from  
272 multiple exogenous forms in canine ancestors, during which related variants likely infected over  
273 a similar timeframe.

274

### 275 ***Prevalence of CfERV-Fc1(a) loci in canids***

276 To more precisely delineate the expansion of the identified CfERV-Fc1(a) members and refine  
277 our dating estimates, we surveyed insertion prevalence within an expanded sample set that more

278 fully represent extant members of the *Canidae* family, including the genomes of the dhole (*Cuon*  
279 *alpinus*), dog-like Andean fox (*Lycalopex culpaeus*), red fox (*Vulpes vulpes*), as well as the  
280 furthest canid outgroups corresponding to the Island (*Urocyon littorali*) and gray foxes (*U.*  
281 *cinereoargenteus*) (Figure 1). Thus, the analysis provided a broad timeline to reconstruct the  
282 evolutionary history of this ERV lineage ranging from host divergences within the last tens of  
283 thousands of years (gray wolves) to several millions of years (true foxes).

284 In total, we *in silico* genotyped 145 insertions (89 reference and 56 non-reference loci)  
285 across 332 genomes of canines and wild canids (refer to Methods; Table S4). To more accurately  
286 facilitate the identification of putative population-specific CfERV-Fc1(a), and to distinguish  
287 possible dog-specific insertions that may have occurred since domestication, wolves with  
288 considerable dog ancestry were removed from subsequent analyses (see Methods). Alleles  
289 corresponding to reference (*i.e.*, CanFam3.1) and alternate loci were recreated based on the  
290 sequence flanking each insertion while accounting for TSD presence. We then inferred genotypes  
291 by re-mapping Illumina reads that spanned either recreated allele for each site per sample.  
292 Reference insertions were deemed suitable for genotyping only if matched TSDs were present  
293 with clear 5' and 3' LTR junctions. We excluded the two non-reference sites with only a single  
294 assembled LTR junction due to uncertainty of both breakpoints (above). To facilitate genotyping  
295 of the eight unresolved assemblies with linked 5' and 3' LTR junctions, we supplemented the  
296 Repbase CfERVF1\_LTR consensus sequence over the missing region (lower case in Table S2).  
297 As has been discussed in earlier work (Wildschutte et al., 2016), this genotyping approach is  
298 limited by the inability of single reads to span the LTR; therefore, the data do not discriminate  
299 between the presence of a solo LTR from that of a provirus at a given locus.

300 Insertion allele frequencies ranged from 0.14% (inferred single insertion allele) to fixed  
301 across samples (Figure 5; all raw data is included in Table S5). The rarest insertions were found  
302 in gray wolves, the majority of which were also present in at least one village or breed dog (for  
303 example, see chr13:16,157,778 and chr15:32,084,977 in Figure 5). All non-reference insertions  
304 were variably present in *Canis* species, and only few had read support in outgroup species (*i.e.*  
305 foxes, dhole). Notably, there was no evidence for the presence of any loci specific to village or  
306 breed dogs. Of outgroup canids, ~33% (48 of 145) insertions were detected in the Andean fox,  
307 and ~50% (a total of 73) insertions were present in the dhole. The remaining foxes, representing  
308 the most distant splits of extant canids, had the lowest prevalence of occupied loci, with just five  
309 insertions found in the gray and Island foxes, respectively. However, this is not unexpected since  
310 insertions private to these lineages would not be ascertained in our discovery sample set.

311 The relative distribution of proviruses was in general agreement with dating via LTR  
312 divergence, though some inconsistencies were observed. No proviruses were detected in the fox  
313 outgroups (*Urocyon* and *Vulpes*) that have an estimated split time from other Canidae of >8 mya  
314 (Kumar et al., 2017), but some were present in the Andean fox (chr2:65,300,388,  
315 chr5:24,576,900) and dhole (chrX:50,661,637, chr11:12,752,994). LTR divergence calculations  
316 using the inferred dog neutral substitution rate dated these insertions near 20.49, 14.80, 6.65,  
317 and 4.94 mya, respectively, suggesting the dating based on LTR divergence may be  
318 overestimated. The youngest proviruses were variably present in *Canis* representatives. Of the  
319 most recent insertions, two (chr5:10,128,780, chr17:9,744,973) were present in both New and  
320 Old World wolves, implying integration prior to the geographic split of this lineage (1.10 mya) (Fan  
321 et al., 2016). The remaining proviruses were present in Old World wolves and dogs only. Among  
322 these was the chr33:22,146,581 provirus that had an estimated date of formation of 6.58 mya by  
323 LTR comparison, consistent with skewed dating of the site. Altogether, the data are consistent  
324 with CfERV-Fc1(a) endogenization in the ancestors of all modern canids followed by numerous  
325 invasions leading to a relatively recent burst of activity in the wolf and dog lineage of *Canis*.

326

### 327 ***Evolution of the CfERV-Fc1(a) lineage in Canidae***

328 LTR sequences are useful in a phylogenetic analysis for exploring the evolutionary patterns of  
329 circulating variants prior to endogenization, as well as following integration within the host. To  
330 infer the evolutionary history leading to CfERV-Fc1(a) presence in modern canids, we constructed  
331 an LTR tree using as many loci as possible (from 19 proviral elements and 142 solo-LTRs) (Figure  
332 6; Table S6).

333 In broadly comparing LTR placement to our inferred species presence (Figure 6), the  
334 longer-branched clusters contained the few ancestral loci present in the outgroups (gray and red  
335 foxes) and those that were mostly fixed among the other surveyed species. However, at least two  
336 non-reference LTRs and other unfixed insertions were also in these clades, suggesting their more  
337 recent formation from related variants therein. One provirus was present within the most basal  
338 clade, and four (including the duplicated locus) were present within intermediate clades. We  
339 observed a major lineage (upper portion of tree) that included the majority of recent integrants.  
340 This lineage gave rise to the greatest number of polymorphic insertions, including a derived clade  
341 of insertions that appears to be *Canis*-specific, with some sites restricted to one or two sub-  
342 populations. This lineage also contains the majority of proviral LTRs (15 of 19 included in the  
343 analysis), most possessing intact *pol* and/or *env* genes. The youngest proviral integrants, as  
344 inferred from high LTR identities and prevalence among sampled genomes, tend to be on short

345 branches within derived clusters that contain the majority of unfixed loci, likely reflecting their  
346 source from a relatively recent burst of activity in *Canis* ancestors.

347         Within the germline, the highest occurrence of recombination resulting in a solo LTR takes  
348 place between identical LTRs (Belshaw et al., 2007, Stankiewicz and Lupski, 2002), implying the  
349 LTR sequence itself is preserved in the solo form. Under this assumption, the presence of identical  
350 solo LTR haplotypes should, in principle, indicate their origin from a common ancestral source.  
351 We identified four such LTR haplotypes within the *Canis*-specific clades, including loci in co-  
352 clusters with one of two proviruses (chr3:82,194,219 and chr4:22,610,555), therefore bounding  
353 the inferred age of these insertions to within the last 1.64 mya (dashed lines in Figure 6). Between  
354 the four identical clusters, the LTR haplotypes shared nucleotide identity ranging from 99.3%  
355 (three substitutions from a consensus of the four clusters) to 99.7% (one substitution), suggesting  
356 their origin from related variants over a common timeframe. We modified our dating method to  
357 obtain an estimated time of formation across each cluster by considering the total concatenated  
358 LTR length per cluster, as has been similarly employed elsewhere (Ishida et al., 2015). This  
359 approach placed tentative formation times of the youngest insertions from a common variant  
360 547,220 years ago (no change over 1,374 bp, or 3 LTRs) and 410,415 years ago (no change over  
361 1,832 bp, or 4 LTRs). Comparison to the inferred prevalence of each cluster indicates the most  
362 recent of these insertions arose in Old World wolves, consistent with this timeframe.

363         Since proviral LTRs begin as an identical pair, aberrant placement in a tree and/or the  
364 presence of mismatched TSDs implies involvement of the locus in post-insertion conversion or  
365 rearrangement (Hughes and Coffin, 2005). LTRs from the youngest proviruses tended to pair on  
366 sister branches. An exception includes the LTRs of the chr33:22,146,581 provirus, whose  
367 mispairing is consistent with conversion of at least one of its LTRs, possibly from the  
368 chr1:48,699,324 provirus or a similar variant (see above). There were six instances of aberrant  
369 LTR placement for the remaining eight CfERV-Fc1(a) proviruses that had both LTRs present  
370 (labeled in Figure 6), suggesting putative post-insertion conversion and contributing to inflated  
371 age estimates based on LTR divergence. The TSD repeats of individual proviruses had matched  
372 5 bp repeats in all cases, suggesting none of the elements have seeded inter-element  
373 chromosomal rearrangements. With exception of three instances of reference solo LTRs that  
374 each had a base change between its flanking repeats, the TSDs for all other solo LTRs were also  
375 intact.

376

### 377 **CfERV-Fc1(a) structure and biology**

#### 378 ***Characterization of the inferred CfERV-Fc1(a) ancestor***

379 As an endogenous element, an ERV may retain close resemblance to its exogenous source over  
380 long periods of time with recent integrants assumed to possess a greater potential to retain the  
381 properties of the infectious progenitor. We combined the eight non-reference proviruses with the  
382 eleven reference insertions to generate an updated consensus (referred to here as CfERV-  
383 Fc1(a)<sub>CON</sub>) as an inferred common ancestor of the CfERV-Fc1(a) sublineage. A detailed  
384 annotation of the updated consensus is provided in Figure S3 and summarized as follows.

385 Consistent with the analysis of Caniform ERV-Fc1 consensus proviruses (Diehl et al.,  
386 2016), CfERV-Fc1(a)<sub>CON</sub> shows an internal segment of uninterrupted ERV-Fc related ORFs for  
387 *gag* (~1.67 kb in length) and *pol* (~3.54 kb; in-frame with *gag*, beginning directly after the *gag* stop  
388 codon, as is typical of C-type gammaretroviral organization). The CfERV-Fc1(a)<sub>CON</sub> *gag* product  
389 was predicted to contain intact structural regions and functional motifs therein for matrix (including  
390 the PPPY late domain involved in particle release and the N-terminal glycine site of myristoylation  
391 that facilitates Gag-cell membrane association), capsid, and nucleocapsid domains (including the  
392 RNA binding zinc-binding finger CCHC-type domains). Likewise, the Fc1(a)<sub>CON</sub> *pol* ORF was  
393 predicted to encode a product with conserved motifs for protease, reverse transcriptase (the  
394 LPQG and YVDD motifs in the RT active center), Rnase H (the catalytic DEDD center of RNA  
395 hydrolysis), and integrase (the DDX<sub>35</sub>E protease resistant core and N-terminal HHCC DNA  
396 binding motif). An *env* reading frame (absent from the Repbase CfERV1 consensus) was also  
397 resolved in the updated consensus. The ERV-W like Fc1<sub>CON</sub> *env* ORF (~1.73 kb) was present  
398 within an alternate ORF overlapping the 3' end of *pol*. Its predicted product included the RRKR  
399 furin cleavage site of SU and TM, the CWIC (SU) and CX<sub>6</sub>CC (TM) motifs involved in SU-TM  
400 interactions, and a putative RD114-and-D-type (RDR) receptor binding motif (Sinha and Johnson,  
401 2017). A hydrophobicity plot generated for the translated sequence identified segments for a  
402 predicted fusion peptide, membrane-anchoring TM region, and immunosuppressive domain (ISD)  
403 (Cianciolo et al., 1985). Putative major splice donor (base 576 within the 5'UTR; 0.67 confidence)  
404 and acceptor sites (base 5,216 within *pol*; 0.85 confidence) were identified that would be predicted  
405 for the generation of *env* mRNA (see Figure S3 and the accompanying legend). The CfERV-  
406 Fc1(a)<sub>CON</sub> element possessed identical LTRs, a tRNA<sup>Phe</sup> binding site for priming reverse  
407 transcription (GAA anticodon; bases 464 to 480), and the canonical 5'-TG...CA-3' terminal  
408 sequences required for integration (Boeke and Stoye, 1997).

409

#### 410 ***Properties of individual CfERV-Fc1(a) proviruses***

411 We assessed the properties of individual full-length elements for signatures of putative function  
412 (summarized in Figure 7). With the exception of the *gag* gene, we identified intact ORFs in several

413 reference copies and most of our non-reference sequenced proviruses. A reading frame for the  
414 *pol* gene was present in six proviruses; of these, all contained apparent RT, RnaseH, and  
415 integrase domains without any changes that would obviously be alter function. Likewise, an *env*  
416 ORF was present among seven proviruses, of which all but one contained the above mentioned  
417 functional domains (the SU-TM cleavage site is disrupted in the chr5:10,128,780 provirus: RRKA).  
418 Comparison of the rate of nonsynonymous ( $d_N$ ) to synonymous ( $d_S$ ) nucleotide substitutions for  
419 the seven intact *env* reading frames revealed an average  $d_N/d_S$  ratio of 0.525, indicating moderate  
420 purifying selection ( $p = 0.02$ , Nei-Gojobori method). The hydrophobicity plot of each *env* ORF was  
421 in agreement with that of the CfERVFc1<sub>CON</sub> provirus, with predicted segments for a fusion peptide,  
422 TM region, and ISD. Comparison to the *pol* and *env* translated products that would be predicted  
423 from the CfERVFc1<sub>CON</sub> inferred the individual proviruses shared 98.4% to 99.3% (Pol) and 98%  
424 to 99.6% (Env) amino acid identity, respectively, and each was distinct from the inferred  
425 consensus.

426 No complete *gag* reading frame was observed in any provirus. Particularly when  
427 compared to *pol* and *env*, the *gag* gene had incurred a number of inactivating mutations, including  
428 several shared frameshifts leading to premature stops. The longest *gag* reading frames  
429 (chr3:82,194,219 and chr26:35,982,438) both possessed a premature stop within the first zinc  
430 finger domain of the nucleocapsid; of note the terminal *gag* frameshift was the only obvious  
431 inactivation of any gene in the latter chr26:35,982,438 provirus. This domain has roles in the  
432 encapsidation of viral genomic RNAs via recognition of a particular packaging signal sequence  
433 (Ali et al., 2016). Thus, absence of both zinc finger domains and the N-terminal myristoylation site  
434 should interfere with canonical Gag functions, regardless of the presence of intact matrix and  
435 capsid domains. Excluding the frameshift leading to the abortive stop in those proviruses, the  
436 translated Gag would have respectively shared 97.8% and 98% amino acid identity to the  
437 CfERVFc1<sub>CON</sub> Gag. Though none of the identified CfERV-Fc1(a) proviruses have retained  
438 complete reading frames for all genes, this finding does not exclude the possibility that rare intact  
439 proviruses remain to be identified, or that a putative infectious variant could be generated via  
440 recombination of co-packaged RNAs.

441 The majority of the CfERV-Fc1(a) proviruses could be assigned to one of two proposed  
442 subgroups based on the presence of a common deletion within the *env* gene (Figure 7). The  
443 deletion spans a 1,073 bp region of *env* (we refer to the segment as *env*<sub>Δ1073</sub>), removing the  
444 internal majority portions of SU and TM (also refer to Figure S3; including the putative receptor  
445 binding domain, motifs involved in SU-TM interactions, and transmembrane domain). Eight  
446 proviruses possessed the *env*<sub>Δ1073</sub> deletion, including the duplicated locus. The frameshift for

447 three of those eight proviruses would result in a product of ~204 amino acids in size  
448 (chr2:65,300,388, chr4:22,610,555, and chr6:47,934,941), though the significance of such a  
449 product is unclear. The prevalence of the *env*<sub>Δ1073</sub> deletion was skewed toward proviruses that  
450 harbored multiple inactivating mutations, while only one possessed a retained ORF  
451 (chr11:12,752,994, *pol*), consistent with the older status of most of these loci. Additionally, the  
452 *env*<sub>Δ1073</sub> deletion was present in the oldest proviruses and inferred to have arisen at least prior to  
453 the split of the dog-like foxes (see chr2:65,300,387 in Figure 5), suggesting its formation early in  
454 CfERV-Fc1(a) evolution (at least 8.7 mya; Figure 1). However, three proviruses with the deletion  
455 could not be genotyped due to the absence of clear LTR-genome junctions or due to  
456 encompassing duplication, making it possible that the allele predates the Andean fox split, as  
457 would be consistent with their placement within the tree (for example, see chr8:73,924,489; Figure  
458 6). The *env*<sub>Δ1073</sub> deletion was not monophyletic in gene or LTR-based phylogenies, as would be  
459 expected if proviruses carrying the allele arose from a ‘master’ source element (Clough et al.,  
460 1996, Nascimento and Rodrigo, 2016). Examination of the regions directly flanking the deletion  
461 did not reveal common base changes shared among members with the allele. Our data are also  
462 not consistent with its transfer to existing proviruses through gene conversion, which should  
463 display shared base changes between all elements with the deletion. Therefore, we propose the  
464 *env*<sub>Δ1073</sub> allele spread via template-switching of co-packaged *env*<sub>Δ1073</sub> RNAs. Any of the above  
465 scenarios would result in the spread of an otherwise defective *env* gene. In contrast, all but two  
466 of the most recently integrated proviruses contained an uninterrupted *env* reading frame. In  
467 addition to the *env*<sub>Δ1073</sub> deletion, unique *env* deletions were present in two other elements.  
468 Specifically, a 1,702 bp deletion which removed all but the first 450 bp of *env* and 291 bp of the  
469 chr17:9,744,973 3’ LTR, as well as the 5’ truncated provirus at chr1:148,699,324 with an 896 bp  
470 deletion situated within the common *env*<sub>Δ1073</sub> deletion.

471

#### 472 ***CfERV-Fc1(a) proliferation in canine ancestors***

473 Nucleotide signatures within ERVs may be used to infer the mode(s) of proliferation, of which  
474 several routes have been described. One such mechanism, *trans* complementation, involves the  
475 co-packaging and spread of transcribed viral RNA genomes by functional viral proteins, supplied  
476 by a virus within the same cell (either exogenous or endogenous), thereby prolonging the  
477 apparent activity of the ERV lineage. As a result, RNAs from otherwise defective proviruses may  
478 be spread in cases where the ERV retains intact structures for transcription by host cell machinery  
479 and RNA packaging (Boeke and Stoye, 1997). Molecular signatures of *trans* complementation

480 may be interpreted from the presence of inherited changes among multiple elements, particularly  
481 ones that would render a provirus defective (Belshaw et al., 2004, Belshaw et al., 2005).

482 We observed evidence for the mobilization of CfERV-Fc1(a) copies via complementation.  
483 For example, examination of the proviral gene regions revealed inherited frameshift-causing  
484 indels and common premature stops that were variably present among the majority of elements  
485 (a total of 12 of the 19 proviruses; also see Figure 7). At least three distinct frameshifts leading to  
486 a stop within *gag* were shared over several elements (from the Fc1<sub>CON</sub> start, bp 882:  
487 chr4:22,610,555, chr11:12,752,994, chr12:869,873; bp 1,911: chr17:9,744,973,  
488 chr33:22,146,581; and bp 2,203: chr3:82,194,219, chr26:35,982,438, and the duplicated  
489 chr3:219,396 and chrUn\_JH373247:11,035 insertions). Proviruses also shared unique deletions  
490 leading to abortive stops within *pol* (near Fc1<sub>CON</sub> bp 3,988: chr1:48,699,324, and  
491 chr3:82,194,219). In addition to the common *env*<sub>Δ1073</sub> frameshift deletion, putative in-frame *pol*  
492 deletions were also present (Fc1<sub>CON</sub> bp 5,263 Δ3 bp: chr3:82,194,219; chrUn\_AAEX03024336:1;  
493 bp 5,705 Δ27 bp: chr5:24,576,900, chrUn\_AAEX03024336:1). Two proviruses contained a  
494 shared stop within *env* (Fc1<sub>CON</sub> bp 6,240: chr3:82,194,219, chr6:47,934,941). The provirus on  
495 chromosome 3 possessed a total of four of the above changes differentially shared with other  
496 proviruses in *gag*, *pol*, and *env*; these were the only defective changes present within the element.  
497 While successive conversion events of the provirus from existing loci cannot be ruled out, this  
498 provirus appears to be a comparatively young element (only found in Old World wolves and dogs),  
499 which more likely suggests formation of the element via multiple intermediate variants. No other  
500 provirus contained multiple common indels.

501 We did not find evidence for expansion of the lineage having proliferated via  
502 retrotransposition in *cis*, during which new insertions are generated in an intracellular process  
503 akin to the retrotransposition of long interspersed elements (Ostertag and Kazazian, 2001). Such  
504 post-insertion expansion is typically accompanied by a loss of the viral *env* gene, particularly  
505 within recently mobilized insertions (as interpreted, for example, by the derived phylogenetic  
506 placement), whereas *gag* and *pol* are retained. Our data suggest this scenario is unlikely given  
507 the absence of a functional *gag* gene and presence of a conserved *env* ORF in several elements,  
508 particularly young ones. In this regard, *cis* retrotransposition tends to facilitate rapid *env*-less copy  
509 expansion and therefore tends to occur among derived copies of a given lineage (Magiorkinis et  
510 al., 2012), and our data suggest the opposite regarding older (loss of *env*) and younger (*env*  
511 present) CfERV-Fc1(a) proviruses.

512

513 **Discussion**



514 Mammalian genomes are littered with the remnants of retroviruses, the vast majority of which are  
515 fixed among species and present as obviously defective copies. However, the genomes of several  
516 species harbor some demonstrably ancient ERVs whose lineages contain relatively intact loci and  
517 are sometimes polymorphic, despite millions of years since integration. Such ERVs have the  
518 potential to exert expression (of either proviral-derived or host-derived products by donation of an  
519 LTR) that may affect the host, especially for intact copies or those within new genomic contexts.  
520 In particular, ERV expression from relatively recent integrants has been linked to disease  
521 (reviewed in (Jern and Coffin, 2008, Mager and Stoye, 2015)). However, there is also growing  
522 evidence that many fixed loci have been functionally co-opted by the host or play a role in host  
523 gene regulation (reviewed in (Frank and Feschotte, 2017)). To begin to discriminate the  
524 relationship of individual elements in the context of the host necessitates a population-level  
525 investigation of the breadth of ERV abundance and prevalence within a species. Illustrating both  
526 bursts of activity and putative extinction, our findings present a comprehensive assessment of the  
527 evolutionary history of a single retroviral lineage through the genomic surveys of nine globally  
528 distributed canid species, some represented by multiple subpopulations.

529 Relative to other animal models, ERV-host relationships within the dog have been  
530 understudied. Until now, reports of canine ERVs have been from analysis of a single genome  
531 assembly or limited screening of reference loci (Martinez Barrio et al., 2011, Jo et al., 2012,  
532 Tarlinton et al., 2013). To further investigate a subset of apparent recent germline integrants  
533 (Martinez Barrio et al., 2011) we surveyed the level of polymorphism and possible mechanisms  
534 of spread of the  $\gamma$ -like ERV-Fc1(a) lineage across a diverse set of canid species. Our exhaustive  
535 analysis of CfERV-Fc1(a) loci is the first population-level characterization of a recently active ERV  
536 group in canids. From analysis of Illumina WGS from 101 representatives from the canid genus  
537 *Canis*, we uncovered numerous insertionally polymorphic sites, corresponding to both reference  
538 loci and insertions that are missing from the dog genome assembly, and performed a comparative  
539 genotyping approach utilizing additional extant *Canidae* members to provide a broad evolutionary  
540 history of this ERV lineage. We identified eight non-reference proviruses that contain ORFs,  
541 display high LTR identities, and have derived placements within a representative phylogeny,  
542 which are all characteristics of relatively young elements.

543 Insertions were located within dog gene models, although permutations indicated that  
544 CfERV-Fc1(a) insertions are significantly depleted within and near genes (Figure S2). Given their  
545 placement in previously unoccupied genomic locales, the presence of such insertions raises the  
546 possibility of biological effects. For example, two intronic LTRs were fixed in all canids: one within  
547 *AIG1*, a transmembrane hydrolase involved in lipid metabolism (Parsons et al., 2016); the other

548 in the diffuse panbronchiolitis region *DPCR1* of the dog major histocompatibility complex 1 (Yan  
549 et al., 2018). Other intronic insertions were fixed in samples following the splits of the true and  
550 dog-like foxes. These included genes with homologs involved in tumor suppression (*OPCML*),  
551 cell growth regulation (*CDKL3*), DNA repair (*FANCL*), and innate immunity (*TMED7-TICAM2*). An  
552 exonic *Canis*-specific solo LTR was located at chr1:107,628,579 within the 3' UTR of *BCAT2*, an  
553 essential gene in metabolizing mitochondrial branched-chain amino acids. In humans, altered  
554 expression of *BCAT2* is implicated in tumor growth and nucleotide biosynthesis in some forms of  
555 pancreatic cancer (Mayers et al., 2016, Dey et al., 2017, Ananieva and Wilkinson, 2018). The  
556 same LTR is situated ~550 bp upstream of *FUT2*, a fucosyltransferase involved ABH blood group  
557 antigen biosynthesis in mucosal secretions (de Mattos, 2016, Ferrer-Admetlla et al., 2009). *FUT2*  
558 variants affect secretion status and have been implicated in intestinal microbiota composition (Le  
559 Pendu et al., 2006), viral resistance (Thorven et al., 2005), and slowed progression of HIV  
560 (Kindberg et al., 2006). Other insertions were upstream and downstream of gene vicinities, again  
561 raising the possibility of host effects (also refer to Table S3). Though connections between LTR  
562 presence and physiology are yet to be determined, these findings will inform future investigations  
563 into the potential effect of CfERVs on host biology.

564 CfERV-Fc1(a) integrants endogenized canid ancestors over a period of several millions  
565 of years (Figure 8B-E). This activity included bouts of infectious activity/mobilization inferred from  
566 the last 20.4 my to the most recent integrants formed within 1.6 mya, the latter of which are only  
567 present in *Canis* sub-populations. The mutation rate we used to obtain these estimated  
568 timeframes ( $1.33 \times 10^{-9}$  changes per site per year (Botigue et al., 2017)) coincides with those from  
569 two other ancient genome analyses, which utilized ancient DNA to calibrate wolf and dog mutation  
570 rates (Skoglund et al., 2015, Frantz et al., 2016). However, our rate is substantially slower than  
571 those used previously to date reference CfERV-Fc1(a) members including  $2.2 \times 10^{-9}$  (as an  
572 “average” mammalian neutral substitution rate) (Martinez Barrio et al., 2011) and the faster rate  
573 of  $4.5 \times 10^{-9}$  (as has been reported for the mouse) (Diehl et al., 2016). Applying those substitution  
574 rates to our data would infer much younger integration times of 11.85 mya to <0.91 mya and 6.1  
575 mya to <0.48 mya, respectively. We note the precision in ERV-Fc1(a) age estimations using this  
576 method is subject to the accuracy of the inferred background mutation rate, but may be skewed  
577 due to the presence of post-insertion sequence exchange between LTRs. As the latter cannot be  
578 conclusively ruled out, we interpret our estimations as broad formation times only.

579 Due to their complete absence of LTR divergence, the youngest CfERV-Fc1(a) ages are  
580 bounded to the estimate of 1.64 my, using the dog substitution rate. Therefore, we employed an  
581 alternative approach that makes use of LTRs that shared haplotypes (Ishida et al., 2015) to narrow

582 the age estimations to ~547,220 and 410,415 years, again, as inferred from the time estimated  
583 to accrue one mutation across multiple identical LTRs (respectively across three and four LTRs  
584 per haplotype). For comparison, applying the average mammalian and mouse substitution rates  
585 to the same data would place either event respectively at 303,251 and 161,734 years ago (no  
586 change over three LTRs) and 227,438 and 121,300 years ago (no change over four LTRs). Both  
587 estimates are consistent with CfERV-Fc1(a) circulation after the estimated emergence of the gray  
588 wolf species 1.1 mya and pre-dating the split of the New and Old World gray wolves (Fan et al.,  
589 2016) (Figure 8F). The branching patterns observed within our LTR phylogeny are consistent with  
590 these findings, implying bursts of replication from closely related variants now recorded in clusters  
591 of LTR haplotypes. In this regard, our findings suggest bouts of infection from multiple circulating  
592 viruses over a relatively short evolutionary time period.

593 CfERV-Fc1(a) activity coincided with major speciation events in canine evolution (Figure  
594 8B-E). Taking into consideration the above approaches for age estimations, we refined the dating  
595 of endogenization events by integrating inferred ages with that of orthologous presence/absence  
596 patterns across numerous canid lineages, many of which are recently diverged clades. The  
597 analysis served two purposes. First, we made use of the tenet that ERV integration is permanent  
598 and the likelihood of two independent integration events at the same locus is negligible. In this  
599 way, the presence of an ERV insertion that is shared between individuals or species supports its  
600 origin in a common ancestor. Therefore, integration prior to or following the split of two or more  
601 species is supported by virtue of insertion presence/absence of occupied loci across those  
602 species. Second, the analysis allowed us to infer insertion genotypes across highly diverse canid  
603 representatives, thus providing the means to gauge the collective patterns of individual CfERV-  
604 Fc1(a) loci among contemporary animals to infer putative sub-population or species-specific  
605 integrants.

606 Comparisons of the approximated insertion dates discussed above in combination with  
607 estimated species split times would place the earliest CfERV-Fc1(a) germline invasions prior to  
608 or near the estimated divergence of the *Canidae* from now extinct ancestors (14.15 mya) (Kumar  
609 et al., 2017), followed by invasions after the split of the true fox (12.9 mya) (Kumar et al., 2017)  
610 and fox-like canid lineages (8.7 mya) (Koepfli et al., 2015). Subsequent insertions also occurred  
611 prior to the split of the South American canid and wolf lineages (3.97 mya) (Koepfli et al., 2015).  
612 According to this timeframe, and consistent with the detection of some young proviral insertions  
613 private to gray wolves and dogs alone (Figure 5), the most recent invasions would have occurred  
614 around the time of the branching event that gave rise to gray wolves (1.10 mya) (Koepfli et al.,  
615 2015). Based on the lack of observed dog-specific loci, our data suggests that CfERV-Fc1(a)

616 replication ceased in wolf ancestors prior to domestication, which is estimated to have begun  
617 around 40 kya (Botigue et al., 2017) (Figure 8G), but does not rule out continued activity. Analysis  
618 of additional genomes, particularly from gray wolves, should clarify the presence of such variants  
619 in future analysis.

620 ERV-Fc1(a) activity included the spread of defective recombinants. Our comparative  
621 analysis of nucleotide differences shared among the proviruses supports a scenario in which  
622 CfERV-Fc1(a) members proliferated in canine ancestors via complementation. Patterns of  
623 discreet, shared changes among distinct elements in all viral genes were observed (*i.e.*,  
624 premature stops and common base changes, indels, in addition to the *env*<sub>Δ1073</sub> segment; Figure  
625 7), consistent with the spread of mutations present from existing Fc1(a) copies, probably via co-  
626 packaging of the defective viral genomes. Of the 19 proviruses analyzed in full, the majority  
627 displayed shared discreet stops or the *env*<sub>Δ1073</sub> deletion, in addition to in-frame indels. This pattern  
628 is consistent with the hypothesis that degradation of ERV genomes, particularly involving the loss  
629 of *env*, offers an evolutionary benefit to the host by preventing the potential horizontal spread of  
630 infectious viruses between individuals, as has been suggested (Magiorkinis et al., 2012, Lober et  
631 al., 2018). The presence of intact *env* genes, and sequence signatures of selective pressure  
632 retained within those *env* reading frames, suggests involvement of Fc1(a) *env* leading to the  
633 putative formation of recombinant proviruses, rather than having been intracellularly  
634 retrotransposed (*in cis*) that would not require a functional envelope. Altogether such patterns of  
635 reinfection may have predominantly occurred within a given individual, as none of these  
636 mechanisms explicitly requires (but does not rule out) spread to other individuals within the  
637 population; indeed concurrent reinfection of a single individual may also lead to unique proviruses  
638 later transmitted to offspring (Young et al., 2012). Indeed, several retroviruses, including HIV,  
639 have been shown to be capable of co-packaging RNA from other retroviruses, even ones with  
640 low sequence homology (Ali et al., 2016). These findings suggest that complementation was a  
641 predominant form of proliferation for the observed CfERV-Fc1(a) loci. In theory, a functional  
642 provirus could arise in a spontaneous recombinant, raising the possibility of bursts of amplification  
643 to come. Indeed, all viral genes in our consensus appear to be intact, illustrative that few changes  
644 would be required to generate a putatively infectious virus.

645 Patterns of shared sequence changes, such as premature stops and in-frame shifts,  
646 indicate that the oldest inherited change involved an in-frame shift in the *pol* gene (from the Fc1<sub>CON</sub>  
647 start, bp 5705 Δ27 bp). Aside from the *env*<sub>Δ1073</sub> deletion, all other common changes were present  
648 in the lineage that led to the majority of young insertions (Figure 6). Among the earliest inferred  
649 changes were premature stops in *gag* (CfERV-Fc1<sub>CON</sub> bp 882 and 2203, respectively) and *env*

650 (CfERV-Fc1<sub>CON</sub> bp 6240) that tended to have been present among elements within a *Canis*-  
651 specific subclade. Additional inherited changes were present in a separate *Canis*-specific  
652 subclade in the form of a third distinct stop in *gag* (CfERV-Fc1<sub>CON</sub> bp 1911). The shared *gag* stop  
653 was only observed within that cluster, suggesting its origin in a timeframe near variants  
654 contributing to the subclade followed by spread to new insertions therein. The stop is present in  
655 the chr17:9,744,973 and chr33:22,146,581 proviruses, therefore limiting LTR dating of the  
656 change; based on its restriction to assayed *Canis* members it likely originated within the last 2.74  
657 my (Koepfli et al., 2015). Taken together, the data are consistent with independent origin and  
658 spread of multiple defective features that began prior to ancestors of the dog-like foxes and  
659 followed the Old and New World wolf split. The phylogenetic placement of defective proviruses  
660 suggests the co-occurrence of spread from multiple sources.

661 The apparent absence of any infectious retrovirus among canines is peculiar, particularly  
662 as individuals are likely to be challenged from viruses infecting prey species. While there have  
663 been reports of retroviral activities and particles displaying characteristic  $\gamma$ -like features in canine  
664 leukemias and lymphomas (Ghernati et al., 2000, Modiano et al., 2005, Modiano et al., 1995,  
665 Onions, 1980, Perk et al., 1992, Safran et al., 1992, Tomley et al., 1983), those findings have not  
666 been substantiated. It is well-known that canine cell lines are permissive for replication of  
667 retroviruses that infect other host species including human (Fadel and Poeschla, 2011), a property  
668 possibly reflecting the loss of the antiviral factor TRIM5 $\alpha$  in canines (Sawyer et al., 2007). A recent  
669 report confirmed transcriptional activity from at least one  $\gamma$ -like CfERV group (non-Fc1(a)) in  
670 canine tissues and cell lines (Tarlinton et al., 2013). We have also preliminarily demonstrated  
671 expression of CfERV-Fc1(a) proviruses in canine tissues and tumor-derived cell lines (Jarosz and  
672 Halo, unpublished data).

673 Expression of ERV groups has been associated with both normal physiology and disease  
674 in several animal models, including humans, based on patterns of ERV-derived products  
675 observed within associated tissues (reviewed in (Jern and Coffin, 2008)). However, the  
676 consequences of this expression are not always clear. It is known from animal studies that ERVs  
677 with similarity to human ERVs, including those with extant forms with replicative activity, as well  
678 as proteins derived from related ERV members, are capable of driving aberrant cellular  
679 proliferation, tumorigenesis, and inciting immune responses (Jern and Coffin, 2008). Given our  
680 findings of the breadth and relative intactness of the CfERV-Fc1(a) lineage, we suggest that de-  
681 regulated expression from these loci is responsible for the  $\gamma$ -retroviral activities previously reported  
682 in canine tumors and cell lines, implying the potential for a pathogenic role of ERV-Fc1(a) loci and  
683 exogenous retroviruses in canines.

## 684 **Materials and Methods**

### 685 **Whole genome sequence data**

686 For ERV discovery, Illumina WGS data were obtained from a total of 101 samples corresponding  
687 to 37 breed dogs, 45 village dogs, and 19 wild canids (Auton et al., 2013, Botigue et al., 2017,  
688 Decker et al., 2015, Fan et al., 2016, Freedman et al., 2014, Marsden et al., 2016, Pendleton et  
689 al., 2018, Koepfli et al., 2015) (Table S1). Data were downloaded in fastq format and processed  
690 to Binary Alignment/Map BAM format using bwa version 7.15 and Picard v 2.9.0. SNV genotypes  
691 of sequenced samples were determined using Genome Analysis Toolkit (GATK) version 3.7  
692 (McKenna et al., 2010). Information corresponding to all samples and sources of raw data is  
693 detailed in Table S1.

694

### 695 **Identification of annotated CfERV1 reference insertions**

696 The dog ERV-Fc1(a) lineage is classified in Repbase as 'CfERV1' derived (Repbase update  
697 10.08) (Jurka et al., 2005). We therefore mined the CanFam3.1 RepeatMasker output for  
698 elements classified as 'CfERV1\_LTR' and 'CfERV1-int' according to Repbase vouchers to  
699 identify dog ERV-Fc1(a) LTRs and proviral elements, respectively. We required the presence of  
700 at least one LTR and contiguous internal sequence for a provirus, and the absence of any  
701 proximal internal region for a solo LTR. A total of 136 insertions were identified, corresponding to  
702 21 proviral elements and 115 solo LTRs. The integration breakpoint  $\pm 1$ kb of each locus was  
703 extracted and used in BLAT searches against the other available carnivoran reference assemblies  
704 corresponding to ferret (MusPutFur1.0) (Peng et al., 2014), panda (BGI\_Shenzhen1.0) (Li et al.,  
705 2010), and cat (Felis\_catus\_8.0) (Pontius et al., 2007) to confirm specificity to the dog reference.  
706 Sequences for proviral loci were extracted from CanFam3.1 based on the start and end positions  
707 of the full-length insertions, and filtered to remove severely truncated elements, resulting in 11  
708 CfERV-Fc1(a) full-length or near full-length elements (*i.e.*, containing at least one viral gene  
709 region and associated 5' or 3' LTR). This count is consistent with recent findings of this ERV group  
710 in the dog reference (Diehl et al., 2016). Solo LTR insertions were filtered similarly to remove  
711 truncated elements, resulting in 96 insertions for further analysis.

712

### 713 **Deletion analysis of reference CfERV-Fc1(a) insertions**

714 Reference insertions corresponding to deletion variants were inferred using the program Delly  
715 (v0.6.7) (Rausch et al., 2012), which processed BAM alignment files from samples indicated in  
716 Table S1 using a MAD score cutoff equal to 7, and a minimum map quality score threshold of at  
717 least 20. Resulting reference deletions with precise breakpoint predictions were next intersected

718 with 'CfERV1' reference coordinates based on RepeatMasker annotations of CanFam3.1. Only  
719 deletion calls corresponding to sizes of a solo LTR (400-500 bp) or a full-length provirus (7-9 kb)  
720 were considered for further analysis.

721  
722 **Identification of non-reference of CfERV-Fc1(a) insertions**  
723 LTR-genome junctions corresponding to non-reference variants were assembled from supporting  
724 Illumina reads (Wildschutte et al., 2015, Wildschutte et al., 2016), with modifications as follows.  
725 The chromosomal positions of candidate non-reference ERVs were first identified using the  
726 program RetroSeq (Keane et al., 2013). Individual BAM files were queried using RetroSeq  
727 discovery to identify ERV-supporting discordant read pairs with one read aligned to the sequences  
728 corresponding to 'CfERV1' and 'CfERV1\_LTR' from RepBase (Jurka et al., 2005). Individual  
729 BAM files were merged for subsequent steps using GATK as described (Wildschutte et al., 2016).  
730 RetroSeq call was run on the merged BAM files requiring  $\geq 2$  supporting read pairs for a call and  
731 output calls of levels 6, 7, and 8 further assessed, resulting in 2,381 candidate insertions. Output  
732 calls within  $\pm 500$  bp of an annotated CfERV from the above queried classes were excluded to  
733 eliminate false calls of known loci. ERV-supporting read pairs and split reads within a 200 bp  
734 window of the call breakpoint were subjected to *de novo* assembly using the program CAP3  
735 (Huang and Madan, 1999). Output contigs were filtered to identify ERV-genome junctions  
736 requiring  $\geq 30$  bp of assembled LTR-derived and genomic sequence in the form of (i) one LTR-  
737 genome junction, (ii) linked assemblies of 5' and 3' LTR junctions, or (ii) a fully resolved LTR  
738 ( $\sim 457$ bp) with clear breakpoints that mapped to CanFam3.1. Contigs that contained putative  
739 CfERV junctions were then aligned back to the reference to precisely map the insertion position  
740 of each call. Assembly comparisons were visualized using the program Miropeats (Parsons,  
741 1995).

742  
743 **Validations and allele screening**  
744 For validating non-reference calls, primers were designed to flank the predicted insertion within  
745  $\sim 200$  bp based on the breakpoint position for a given site. Genomic DNA from a subset of samples  
746 with predicted insertion variants was used for validations. DNA with limited material was subjected  
747 to whole genome amplification (WGA) from  $\sim 10$ ng genomic DNA according to the manufacturer's  
748 protocol (Repli-G, Qiagen). For each sample, WGA DNA was diluted 1:20 in nuclease free water  
749 and 1  $\mu$ L was utilized per PCR reaction. Two PCR reactions were run for each site in standard  
750 conditions using Taq polymerase (Invitrogen): one reaction utilized primers flanking each  
751 candidate call to detect the empty or solo LTR alleles; the second was to detect the presence of

752 a proviral junction, utilizing the appropriate flanking primer paired with a primer within the CfERV-  
753 Fc1(a) proviral 5'UTR (near base ~506 from the start of the Repbase F1 consensus element).  
754 Sanger sequencing was performed on at least one positive sample. When detected, provirus  
755 insertions were amplified in overlapping fragments from a single sample in a Picomaxx reaction  
756 per the manufacturer's instructions (Stratagene) and sequenced to  $\geq 4x$  across the full element. A  
757 consensus was then constructed for each insertion based on the Sanger reads obtained from  
758 each site. All sequences corresponding to non-reference solo-LTR insertions and all sequenced  
759 proviral elements have been made available in Table S2.

760

### 761 **Genomic distribution**

762 The positions of the reference and non-reference insertions were intersected with Ensembl dog  
763 gene models (Release 81; [ftp.ensembl.org/pub/release-81/gtf/canis\\_familiaris/](ftp.ensembl.org/pub/release-81/gtf/canis_familiaris/)). Intersections  
764 were performed using bedtools (Quinlan, 2014) with window sizes of 0, 5, 10, 25, 50, and 100 kb.  
765 To assess significant enrichment of insertions relative to genic regions, we performed one  
766 thousand permutations of randomly shuffled insertion positions, intersected the new positions with  
767 genes, and calculated the number of insertions intersecting genes within the varying window sizes  
768 as above. P-values were calculated as the number of permuted insertion sets out of one thousand  
769 that intersected with less than or equal to the number of genes observed in the true insertion set.

770

### 771 **Dating of individual proviruses**

772 A molecular clock analysis based on LTR divergence was used to estimate times of insertion  
773 (Diehl et al., 2016, Johnson and Coffin, 1999, Wildschutte et al., 2016). For 7 non-reference and  
774 8 reference proviruses that had 5' and 3' LTRs present, the nucleotide differences between those  
775 LTRs was calculated, treating gaps  $>2bp$  as single changes. The total number of changes was  
776 then divided by the LTR length (e.g. 457 bp), and the percent divergence normalized to the  
777 inferred canine background mutation rate of  $1.3 \times 10^{-9}$  changes per site per year (Botigue et al.,  
778 2017) to obtain age estimations in millions of years for individual insertions. The provirus at  
779 chr17:97,449,73 was excluded from the analysis due to truncation of its 3' LTR. We extended  
780 LTR dating to estimate times of formation for identical LTR groups that included solo LTRs using  
781 a modification of the above approach as described elsewhere (Ishida et al., 2015). Briefly, the  
782 total length in bp of the LTRs making up each cluster was collectively added and the age estimate  
783 obtained by the percent divergence for a single base pair to have been introduced along the total  
784 length utilizing the same mutation rate of  $1.3 \times 10^{-9}$  changes per site per year.

785



## 786 ***In silico* genotyping**

787 We genotyped 145 insertions (89 reference and 56 non-reference insertions) utilizing whole  
788 genome Illumina reads and reconstructed alleles corresponding to the empty and occupied sites.  
789 Genotyping was performed on 332 individuals including the 101 samples utilized for discoveries  
790 of polymorphic variants (Kim et al., 2012, Vamathevan et al., 2013, Owczarek-Lipska et al., 2013,  
791 Wang et al., 2013, Kim et al., 2013, Auton et al., 2013, Koepfli et al., 2015, Botigue et al., 2017,  
792 Freedman et al., 2014, Li et al., 2014, Zhang et al., 2014, Decker et al., 2015, Wang et al., 2016,  
793 Fan et al., 2016, Marsden et al., 2016, Robinson et al., 2016, Liu et al., 2014) (Table S4).  
794 Reference insertions were deemed to be suitable for genotyping based on manual assessment  
795 for the presence of paired TSDs and uninterrupted flanking sequence. Sites associated with  
796 duplication events were identified by comparison of flanking regions and TSD presence, and  
797 insertions within encompassing duplication (proviruses at chr3:219,396 and  
798 chrUn\_JH373247:11,035), or situated within duplicated pre-insertion segments  
799 (chrUn\_AAEX03025486:2,349) were excluded, as were sites with single assembled junctions  
800 (chr13:20,887,612; chr27:44,066,943; Table S2). The sequences from validated and completely  
801 assembled LTRs were utilized for allele reconstruction of non-reference sites. For example, the  
802 validated sequences for the non-reference solo LTRs at chr2:32,863,024 (8 bp LTR extension)  
803 and chr32:7,493,322 (associated with deletion of reference sequence) were included for  
804 genotyping of alternate alleles. For sites with linked, but non-resolved, 5' and 3' assembled  
805 junctions (*i.e.*, missing internal sequence), we substituted the internal portion of each element  
806 from the Repbase CfERV1 consensus (see Table S2), and used the inferred sequence for allele  
807 reconstruction. Insertion and pre-insertion alleles were then recreated based on  $\pm 600$ bp flanking  
808 each insertion point relative to the CanFam3.1 reference, accounting for each 5bp TSD pair. For  
809 each sample, genotype likelihoods were then assessed at each site based on re-mapping of those  
810 reads to either allele, with error probabilities based on read mapping quality (Li, 2011, Wildschutte  
811 et al., 2015), excluding sites without re-mapped reads for a given sample. Read pairs for which  
812 both reads mapped to the internal portion of the element were excluded to avoid false positive  
813 calls potentially introduced by non-specific alignment. The pipeline for genotyping is available at  
814 <https://github.com/KiddLab/insertion-genotype>. The genotyped samples were sorted by ancestral  
815 population, and allele frequencies estimated for the total number of individuals per population  
816 genotyped at each locus (Table S5).

817

## 818 **Admixture**

819 A sample set containing only dogs and wolves were previously genotyped at approximately 7.6  
820 million SNPs determined to capture genetic diversity across canids (Botigue et al., 2017). Using  
821 Plink (Purcell et al., 2007), sites were filtered to remove those with missing genotypes in at least  
822 ten percent of samples, those in LD with another SNP within 50 bp (--indep-pairwise 50 10 0.1),  
823 and randomly thinned to 500,000 SNPs. To reduce the bias of relatedness, the sample set was  
824 further filtered to remove duplicates within a single modern breed, leaving 254 samples (Table  
825 S7). Identification of wolf samples with high dog ancestry was made through five independent  
826 ADMIXTURE (Alexander et al., 2009) analyses of the thinned SNP set with random seeds  
827 (558905, 110684, 501738, 37781236, and 85140928) for K values 2 through 6. Since we aimed  
828 to discern cfERV-Fc1(a) insertions that may be dog-specific (*i.e.* having occurred since  
829 domestication), we removed any gray wolf that had high dog ancestry from further analysis. To  
830 do this, we calculated average dog ancestry within gray wolves at K=3 across all runs, which was  
831 the K value with the lowest cross validation error rate. Wolves with greater than 10% dog ancestry  
832 (an Israeli (isw01) and Spanish (spw01) wolf) were excluded from subsequent species and sub-  
833 population assessments.

834

### 835 **Phylogenetic analysis**

836 Nucleotide alignments were performed using MUSCLE (Edgar, 2004) followed by manual editing  
837 in BioEdit (Hall, 1999) for intact CfERV-Fc1(a) LTRs from 19 proviral elements and 142 solo-  
838 LTRs. Of non-reference elements, the solo LTR with a 388 bp internal deletion at  
839 chr22:57,677,068 was excluded, as was the 141 bp truncated solo LTR at chr5:80,814,713. We  
840 also excluded partially reconstructed insertions corresponding to ‘one-sided’ assemblies or sites  
841 with linked 5’ and 3’ assembled junctions but that lacked internal resolution (Table S1). A  
842 maximum likelihood (ML) phylogeny was reconstructed from the LTR alignment using FastTree  
843 (Price et al., 2010) and the (GTR+CAT) model (generalized time reversible (GTR) model of  
844 nucleotide substitution plus “CAT” rate approximation). To infer the robustness of inferred splits  
845 in the phylogeny, local support values were calculated using the ML-based approach  
846 implemented in FastTree, wherein the Shimodaira-Hasegawa test is applied to the three alternate  
847 topologies (NNIs) around each node. The average  $d_N/d_S$  ratio for intact env genes was determined  
848 using the codeml program in the PAML software package (version 4.8) (Xu and Yang, 2013)  
849 based on a Neighbor-Joining tree. Statistical significance was determined using the Nei-Gojobori  
850 method (Nei and Gojobori, 1986) implemented in MEGA7 (Kumar et al., 2016) with a null  
851 hypothesis of strict neutrality ( $d_N = d_S$ ).

852

853 **Acknowledgments**

854 We thank John Coffin, Michael Freeman, Welkin Johnson and Zachary Williams for meaningful  
855 discussion and comments, and all owners and donors involved in sample donations for genomic  
856 DNA sources. We thank Anna Kukekova for sharing red fox genome data and Adam Boyko,  
857 Tomàs Marquès-Bonet, Carles Vilà, and Robert Wayne for early access to genome sequence  
858 data. Images of canids were obtained for *Urocyon littoralis* (“Island Fox II” (CC BY 2.0) by  
859 Shanthanu Bhardwaj), *Vulpes vulpes* (“El pequeño amigo” (CC BY 2.0) by Minette Lang),  
860 *Lycalopex culpaeus* (by Christian Mehlführer; Wikimedia Commons), *Cuon alpinus* (Wikimedia  
861 Commons), and *Canis lupus* (www.usda.gov). This work was supported in part by a National  
862 Institutes of Health Academic Research Enhancement Award R15GM122028 to JVH, National  
863 Institutes of Health grant R01GM103961 to JMK, National Institutes of Health Training Fellowship  
864 T32HG00040 to ALP, and UK Medical Research Council MC\_UU\_12014/10 to RJG. DNA  
865 samples were provided by the Cornell Veterinary Biobank, a resource built with the support of  
866 NIH grant R24GM082910 and the Cornell University College of Veterinary Medicine.

867

868 **Author Contributions**

869 JVH, ALP, and JMK designed the study. JVH, ALP, and JMK were responsible for genome data  
870 processing. JVH, ASJ, MLD were responsible for sequence-based analysis. JVH, ALP, RJG and  
871 JMK were responsible for data analysis. JVH, ALP, and JMK wrote the paper. All authors have  
872 read and approved the final manuscript.

873

874 **Competing Interests**

875 The authors declare no competing interests exist.

876

877 **Figure Legends**

878

879 **Figure 1. Canidae evolution and representative extant species.** Relative to other Caniforms,  
880 the evolutionary relationship of the four major canid lineages, along with estimated split times  
881 (determined from (Kumar et al., 2017) and (Koepli et al., 2015)) is shown. Species with asterisks  
882 were included in CfERV-Fc1(a) discovery, and all canids here were used for *in silico* genotyping.  
883 Images are provided for the underlined species. See acknowledgements for all image credits.

884

885 **Figure 2. Strategy for detecting insertionally polymorphic ERV variants.** (A) ERV allelic  
886 presence. Upper: full-length provirus; Mid: solo LTR recombinant; Lower, unoccupied (pre-  
887 integration) site. (B) Strategy for detection of reference ERV deletions. Illumina read pairs were  
888 mapped to the CanFam3.1 reference, deletion-supporting read pairs and split reads identified  
889 using the program Delly (Rausch et al., 2012), and candidate calls then intersected with  
890 RepeatMasker outputs considering 'CFERVF1' repeats. Deletion calls within a size range  
891 corresponding to a solo LTR or provirus were selected for further analysis. (C) Strategy for  
892 detection of non-reference ERV insertions. ERV insertion-supporting anchored read pairs were  
893 identified from merged Illumina data mapped to the CanFam3.1 reference using the RetroSeq  
894 program (Keane et al., 2013). Insertion-supporting read pairs and intersecting split reads were  
895 assembled, assemblies for which 'CfERVF1' sequence was present were identified by  
896 RepeatMasker analysis, and the assembled contigs then re-mapped to the dog CanFam3.1  
897 reference for precise breakpoint identification.

898

899 **Figure 3. Representative allele screening of polymorphic loci.** PCR screens of a subset of  
900 non-reference CfERV-Fc1(a) integrants. Validation of insertionally polymorphic sites was  
901 performed for seven candidate sites across genomic DNA from a panel of breed dogs. (A)  
902 Strategy for primer design and allele detection. Primers were designed to target within 250 bp of  
903 the insertion coordinates based on re-mapping of the assembled breakpoints to the CanFam3.1  
904 reference. Two primers sets were used for each locus: one utilized an internal and flanking primer  
905 to amplify the 5' LTR of a full-length element; another set was used for detection of the pre-  
906 integration (unoccupied) or solo LTR alleles each locus. (B) Banding patterns supporting the  
907 unoccupied, solo LTR, or full-length alleles. The chromosomal location of each integrant is  
908 indicated at left; allele presence is indicated at right: (+) insertion presence and detected allele; (-  
909 ) insertion absence. Samples: A, boxer; B, Labrador retriever; C, golden retriever; D, Springer  
910 spaniel; E, standard poodle; F, German shepherd; G, shar-pei.

911  
912 **Figure 4. Assessment of assembled non-reference alleles.** LTR insertions associated with  
913 structural variation as captured in assembled Illumina read data. Local three-way alignments were  
914 generated for each assembled locus using the program Miropeats (Parsons, 1995). Each  
915 consisted of the LTR allele obtained by read assembly, the validated LTR allele obtained by  
916 Sanger sequencing of the locus in one individual, and the empty locus as present within the  
917 CanFam3.1 reference. Alignments are shown for three representative LTR assemblies. The allele  
918 type is labeled at left in each alignment; lines are used to indicate the breakpoint position of the  
919 insertion and shared sequence between alleles. (A) An LTR assembly that includes captured  
920 deletion of a bimorphic SINE\_Cf insertion present in the CanFam3.1 reference. (B) An assembled  
921 LTR associated with a short 34 bp deletion of sequence that is present in the reference. (C) A  
922 validated assembly of an LTR that included an 8 bp extension relative to the canonical CfERV1  
923 repeat.

924  
925 **Figure 5. Distribution of CfERV-Fc1(a) insertions in the genomes of modern canids.** *In silico*  
926 genotyping was performed for 145 LTRs utilizing whole genome data across 347 sequenced  
927 canids, which were selected to represent extant members of all major *Canidae* lineages (Figure  
928 1). Sample names are indicated above according to species or sub-population. Samples  
929 correspond to the Island and gray foxes (the furthest outgroup species; n=8), red fox (n=1),  
930 Andean fox (n=1), dhole (n=1), golden jackal (n=1), golden wolf (n=1), coyote (n=3), red wolf  
931 (n=2), and representatives of gray wolf sub-populations (n=33), village dogs (n=111), ancient  
932 breed dogs (n=38), and modern breed dogs (n=154). 'Insertion' and 'unoccupied' alleles were  
933 recreated utilizing the CanFam3.1 reference and genotypes were inferred by re-mapping Illumina  
934 reads that spanned either recreated allele for each sample. Samples lacking remapped reads  
935 across a given site were excluded from genotyping at that site alone (indicated with a '.'). Allele  
936 frequencies were calculated for each species or sub-population (see Methods) and plotted as a  
937 heat map (insertion frequency indicated by color bar at top). The locus identifier for each insertion  
938 (left) corresponds to the chromosome and the leftmost insertion breakpoint, irrespective of  
939 insertion orientation. Non-reference and reference insertions are indicated by an 'N' and 'R',  
940 respectively. Full-length proviruses are highlighted with a green diamond.

941  
942 **Figure 6. Evolutionary history of the CfERV-Fc1(a) lineage in canids.** An approximately-  
943 maximum-likelihood phylogeny was reconstructed from an alignment of 157 ERV-Fc LTR  
944 sequences. The tree has been midpoint-rooted for display purposes. Asterisks below nodes

945 indicate local support values > 70%. Each insertion is denoted corresponding to chromosomal  
946 position relative to CanFam3.1 coordinates. A color bar is shown at the right to denote element  
947 presence as fixed among *Canis* (dark blue), insertionally polymorphic (light blue), or not  
948 genotyped (gray). Elements identified as fixed among *Canis* insertionally polymorphic have been  
949 further highlighted by blue shading. LTRs belonging to proviruses are indicated along with the  
950 chromosomal position with a (5') or (3') as appropriate. Clusters of identical LTR haplotypes are  
951 indicated with a vertical dashed line. Mis-matched pairs of proviral LTRs are indicated by a  
952 diamond. LTRs from proviruses lacking cognate LTR pairs (*i.e.*, due to truncation of the element)  
953 are indicated with a cross. The scale bar shown represents the evolutionary distance in  
954 substitutions per site.

955  
956 **Figure 7. Structural features of CfERV-Fc1(a) proviruses.** (A) Representation of the CfERV-  
957 Fc1(a)<sub>CON</sub> provirus. Viral gene reading frames for ERV-Fc related *gag* and *pol* are shown in blue;  
958 the ERV-W related *env* is shown in orange. Color usage is consistent with that of (Diehl et al.,  
959 2016). LTRs are colored in gray: U3 is in medium tone; R is dark; U5 is light. The provirus and  
960 open reading frames are shown to scale. (B) Structural features of non-reference and reference  
961 proviruses. When present, open reading frames are indicated above the appropriate element.  
962 Insertions and deletions >3 bases are depicted with blue and red flags, respectively. The *env*<sub>Δ1073</sub>  
963 deletion is labeled and indicated by a dashed line, as are other truncated or deleted element  
964 features. Reference gaps present within are shown in light gray boxes to scale. Stop codons are  
965 indicated with a black or red asterisk, where red is used to specify premature stops common to  
966 two or more proviruses. Crosses at the left indicate proviruses that are unfixed among *Canis*  
967 samples. The number of substitutions between LTRs is shown at right with the corresponding  
968 calculated age as inferred based on the neutral substitution rate of  $1.33 \times 10^{-9}$  changes per site per  
969 year (Botigue et al., 2017).

970  
971 **Figure 8. History of CfERV-Fc1(a) germline invasion in the Canidae.** A timeline of major  
972 events in canid or CfERV-Fc1(a) evolutionary history relative to estimated insertion events. At the  
973 approximate time point, branching events of the major canid lineages are indicated by arrows  
974 along the timeline with colors matching Figure 1. Indicated by proviruses to the right of the timeline  
975 are estimated insertion times based on genotyping data from Figure 5. (A) Based on its presence  
976 in all canids, the recombination event that formed the provirus (B), which infected canid ancestors  
977 occurred sometime between the split of the major Caniform lineages (A) and the origins of canids  
978 in North America (C). Following the migration to Eurasia (D), a major species radiation occurred

979 in the wolf-like canid lineage (E). Finally, the comparatively recent re-introduction of gray wolves  
980 in North America reflects the split between the Old and New World wolves (F), which likely partially  
981 coincided with the domestication of Old World Wolves (G). Estimated timings for events A-C are  
982 supported by (Kumar et al., 2017), D-E by (Wang and Tedford, 2008), F by (Koblmüller et al.,  
983 2016), and G by (Botigue et al., 2017).

984

985

## 986 **Supplemental Figure Legends**

987

988 **Figure S1. Assembled CfERV breakpoints remapped to the CanFam3.1 reference.** Three-  
989 way alignments for 58 non-reference insertions are shown. Alignments were used to depict  
990 CfERV-Fc1(a) LTR junctions obtained by assembled supporting reads (shown in red text)  
991 remapped to the CanFam3.1 reference sequence (shown in black text and underlined). The 5bp  
992 sequence corresponding to the target site duplication is underlined and bolded in the reference  
993 allele. The coordinates of the CanFam3.1 reference sequence shown is provided above each  
994 alignment; the first base of the LTR is labeled and indicated by an asterisk shown respective of  
995 orientation ('+' or '-'). Insertions for which a provirus was validated are labeled as appropriate.  
996 The single assembled junctions are provided for either of two insertions: chr13:20,998,612 (3'  
997 junction); chr27:44,066,943 (5' junction).

998

999 **Figure S2. Depletion of CfERV-Fc1(a) insertions near dog gene models.** Following one  
1000 thousand permutations, the number of gene models that intersect with shuffled CfERV-Fc1(a)  
1001 insertions are displayed in histograms. Permuted insertions that intersect with at least one  
1002 Ensembl dog gene model precisely (green), within 10 kb (blue) or 50 kb (gray) are shown. Red  
1003 lines indicate the observed number of insertions from the true set.

1004

1005 **Figure S3. Annotated CfERV-Fc1(a) consensus provirus.** A consensus provirus was deduced  
1006 from 19 proviruses using BioEdit (<http://www.mbio.ncsu.edu/BioEdit/bioedit.html>) based on the  
1007 most commonly represented nucleotide at each site. The consensus nucleotide sequence is  
1008 shown in black text. The 5' and 3' LTRs are labeled with black bars. The translated sequences  
1009 for the viral genes are indicated below and with bars at the right, with the Gag sequence in blue,  
1010 Pol in orange, and Env in green. Motifs pertaining to viral functions are labeled appropriately on  
1011 their translated sequence and general annotated in the right sidebar. Translated start and stop  
1012 sites are indicated for each of the three genes. Segments for a predicted fusion peptide,

1013 membrane-anchoring TM region, and immunosuppressive domain (ISD) were determined using  
1014 the program Phobius (<http://phobius.sbc.su.se>). Putative major splice donor and acceptor sites  
1015 were determined using the program NetGene2 (<http://www.cbs.dtu.dk/services/NetGene2/>).

1016

## 1017 **Supplemental Tables**

1018

1019 **Table S1. Canine sample information for discovery of CfERV-Fc1(a) insertions.** Information  
1020 for the resequencing dataset of 101 canines used for CfERV-Fc1(a) insertion discovery. The  
1021 sample identifier, sex, breed/species/population information and canine group is given per  
1022 sample. Also provided are the Short Read Archive (SRA) sequence identifiers (SRR) matching  
1023 the files downloaded and processed in this study, along with the PubMed identifier for the  
1024 accompanying published study (if available) for each sample.

1025

1026 **Table S2. Information for non-reference sites considered in analyses.** The coordinates  
1027 relative to CanFam3.1 are provided for each identified non-reference insertion. For each site,  
1028 information pertaining to the insertion orientation, target site duplication (relative to the  
1029 CanFam3.1 reference), detected insertion alleles (provirus, solo LTR), and element sequence is  
1030 provided. Primer sequences are provided for validated sites. (A) Information for sequenced loci  
1031 and validated sequences. (B) Information for loci with complete assembled insertion alleles. (C)  
1032 Information for loci with partially assembled insertion alleles.

1033

1034 **Table S3. Gene region information and GO ontology analyses.** The coordinates for each  
1035 reference and non-reference insertion are provided along with Ensembl gene models from dog  
1036 (release #81) that are within window distances of 0, 5, 10, 25, 50, and 100 kb of the insertion.

1037

1038 **Table S4. Sample information for canid genotyping.** Sample and data access information for  
1039 the resequencing dataset of 332 canines genotyped at the discovered CfERV-Fc1(a) reference  
1040 and non-reference insertions. Accompanying data descriptions provided for each sample match  
1041 that of Table S1.

1042

1043 **Table S5. Genotypes and inferred allele frequencies.** Raw genotypes obtained across 332  
1044 resequenced samples for 56 non-reference and 89 reference insertions are provided in vcf format.  
1045 Allele frequencies were calculated from raw genotypes per canid species or sub-population, as  
1046 indicated above each column. Non-genotyped sites are noted with a "-".



1047

1048 **Table S6. LTR nucleotide alignment.** LTR alignment for phylogenetic analysis using LTRs from  
1049 a total of 19 proviruses and 142 solo LTRs, provided in fasta format.

1050

1051 **Table S7. Samples included in admixture analysis.** Sample information for the 254 samples  
1052 included in admixture analysis. Accompanying data columns provided for each sample match  
1053 that of Table S1.

1054

1055 **References**

- 1056
- 1057 ALEXANDER, D. H., NOVEMBRE, J. & LANGE, K. 2009. Fast model-based estimation of
- 1058 ancestry in unrelated individuals. *Genome Res*, 19, 1655-64.
- 1059 ALI, L. M., RIZVI, T. A. & MUSTAFA, F. 2016. Cross- and Co-Packaging of Retroviral RNAs and
- 1060 Their Consequences. *Viruses*, 8.
- 1061 ANANIEVA, E. A. & WILKINSON, A. C. 2018. Branched-chain amino acid metabolism in
- 1062 cancer. *Curr Opin Clin Nutr Metab Care*, 21, 64-70.
- 1063 AUTON, A., RUI LI, Y., KIDD, J., OLIVEIRA, K., NADEL, J., HOLLOWAY, J. K., HAYWARD, J.
- 1064 J., COHEN, P. E., GREALLY, J. M., WANG, J., BUSTAMANTE, C. D. & BOYKO, A. R.
- 1065 2013. Genetic recombination is targeted towards gene promoter regions in dogs. *PLoS*
- 1066 *Genet*, 9, e1003984.
- 1067 BELSHAW, R., KATZOURAKIS, A., PACES, J., BURT, A. & TRISTEM, M. 2005. High copy
- 1068 number in human endogenous retrovirus families is associated with copying
- 1069 mechanisms in addition to reinfection. *Mol Biol Evol*, 22, 814-7.
- 1070 BELSHAW, R., PEREIRA, V., KATZOURAKIS, A., TALBOT, G., PACES, J., BURT, A. &
- 1071 TRISTEM, M. 2004. Long-term reinfection of the human genome by endogenous
- 1072 retroviruses. *Proc Natl Acad Sci U S A*, 101, 4894-9.
- 1073 BELSHAW, R., WATSON, J., KATZOURAKIS, A., HOWE, A., WOOLVEN-ALLEN, J., BURT, A.
- 1074 & TRISTEM, M. 2007. Rate of recombinational deletion among human endogenous
- 1075 retroviruses. *J Virol*, 81, 9437-42.
- 1076 BENIT, L., CALTEAU, A. & HEIDMANN, T. 2003. Characterization of the low-copy HERV-Fc
- 1077 family: evidence for recent integrations in primates of elements with coding envelope
- 1078 genes. *Virology*, 312, 159-68.
- 1079 BLANCO-MELO, D., GIFFORD, R. J. & BIENIASZ, P. D. 2017. Co-option of an endogenous
- 1080 retrovirus envelope for host defense in hominid ancestors. *Elife*, 6.
- 1081 BOEKE, J. D. & STOYE, J. P. 1997. Retrotransposons, endogenous retroviruses, and the
- 1082 evolution of retroelements. In: COFFIN, J., HUGHES, S. & VARMUS, H. (eds.)
- 1083 *Retroviruses*. New York, NY: CSHL Press.
- 1084 BOTIGUE, L. R., SONG, S., SCHEU, A., GOPALAN, S., PENDLETON, A. L., OETJENS, M.,
- 1085 TARAVELLA, A. M., SEREGELY, T., ZEEB-LANZ, A., ARBOGAST, R. M., BOBO, D.,
- 1086 DALY, K., UNTERLANDER, M., BURGER, J., KIDD, J. M. & VEERAMAH, K. R. 2017.
- 1087 Ancient European dog genomes reveal continuity since the Early Neolithic. *Nat*
- 1088 *Commun*, 8, 16082.
- 1089 CHUONG, E. B., ELDE, N. C. & FESCHOTTE, C. 2016. Regulatory evolution of innate
- 1090 immunity through co-option of endogenous retroviruses. *Science*, 351, 1083-7.
- 1091 CIANCIOLO, G. J., COPELAND, T. D., OROSZLAN, S. & SNYDERMAN, R. 1985. Inhibition of
- 1092 lymphocyte proliferation by a synthetic peptide homologous to retroviral envelope
- 1093 proteins. *Science*, 230, 453-5.
- 1094 CLOUGH, J. E., FOSTER, J. A., BARNETT, M. & WICHMAN, H. A. 1996. Computer simulation
- 1095 of transposable element evolution: random template and strict master models. *J Mol*
- 1096 *Evol*, 42, 52-8.
- 1097 DE MATTOS, L. C. 2016. Structural diversity and biological importance of ABO, H, Lewis and
- 1098 secretor histo-blood group carbohydrates. *Rev Bras Hematol Hemoter*, 38, 331-340.
- 1099 DECKER, B., DAVIS, B. W., RIMBAULT, M., LONG, A. H., KARLINS, E., JAGANNATHAN, V.,
- 1100 REIMAN, R., PARKER, H. G., DROGEMULLER, C., CORNEVEAUX, J. J., CHAPMAN,
- 1101 E. S., TRENT, J. M., LEEB, T., HUENTELMAN, M. J., WAYNE, R. K., KARYADI, D. M.
- 1102 & OSTRANDER, E. A. 2015. Comparison against 186 canid whole-genome sequences
- 1103 reveals survival strategies of an ancient clonally transmissible canine tumor. *Genome*
- 1104 *Res*, 25, 1646-55.

- 1105 DEY, P., BADDOUR, J., MULLER, F., WU, C. C., WANG, H., LIAO, W. T., LAN, Z., CHEN, A.,  
1106 GUTSCHNER, T., KANG, Y., FLEMING, J., SATANI, N., ZHAO, D., ACHREJA, A.,  
1107 YANG, L., LEE, J., CHANG, E., GENOVESE, G., VIALE, A., YING, H., DRAETTA, G.,  
1108 MAITRA, A., WANG, Y. A., NAGRATH, D. & DEPINHO, R. A. 2017. Genomic deletion of  
1109 malic enzyme 2 confers collateral lethality in pancreatic cancer. *Nature*, 542, 119-123.  
1110 DIEHL, W. E., PATEL, N., HALM, K. & JOHNSON, W. E. 2016. Tracking interspecies  
1111 transmission and long-term evolution of an ancient retrovirus using the genomes of  
1112 modern mammals. *Elife*, 5.  
1113 EDGAR, R. C. 2004. MUSCLE: multiple sequence alignment with high accuracy and high  
1114 throughput. *Nucleic Acids Res*, 32, 1792-7.  
1115 ELLEDER, D., KIM, O., PADHI, A., BANKERT, J. G., SIMEONOV, I., SCHUSTER, S. C.,  
1116 WITTEKINDT, N. E., MOTAMENY, S. & POSS, M. 2012. Polymorphic integrations of an  
1117 endogenous gammaretrovirus in the mule deer genome. *J Virol*, 86, 2787-96.  
1118 FADEL, H. J. & POESCHLA, E. M. 2011. Retroviral restriction and dependency factors in  
1119 primates and carnivores. *Vet Immunol Immunopathol*, 143, 179-89.  
1120 FAN, Z., SILVA, P., GRONAU, I., WANG, S., ARMERO, A. S., SCHWEIZER, R. M., RAMIREZ,  
1121 O., POLLINGER, J., GALAVERNI, M., ORTEGA DEL-VECCHYO, D., DU, L., ZHANG,  
1122 W., ZHANG, Z., XING, J., VILA, C., MARQUES-BONET, T., GODINHO, R., YUE, B. &  
1123 WAYNE, R. K. 2016. Worldwide patterns of genomic variation and admixture in gray  
1124 wolves. *Genome Res*, 26, 163-73.  
1125 FERRER-ADMETLLA, A., SIKORA, M., LAAYOUNI, H., ESTEVE, A., ROUBINET, F.,  
1126 BLANCHER, A., CALAFELL, F., BERTRANPETIT, J. & CASALS, F. 2009. A natural  
1127 history of FUT2 polymorphism in humans. *Mol Biol Evol*, 26, 1993-2003.  
1128 FRANK, J. A. & FESCHOTTE, C. 2017. Co-option of endogenous viral sequences for host cell  
1129 function. *Curr Opin Virol*, 25, 81-89.  
1130 FRANTZ, L. A., MULLIN, V. E., PIONNIER-CAPITAN, M., LEBRASSEUR, O., OLLIVIER, M.,  
1131 PERRI, A., LINDERHOLM, A., MATTIANGELI, V., TEASDALE, M. D., DIMOPOULOS,  
1132 E. A., TRESSET, A., DUFFRAISSE, M., MCCORMICK, F., BARTOSIEWICZ, L., GAL,  
1133 E., NYERGES, E. A., SABLIN, M. V., BREHARD, S., MASHKOUR, M., BALASESCU,  
1134 A., GILLET, B., HUGHES, S., CHASSAING, O., HITTE, C., VIGNE, J. D., DOBNEY, K.,  
1135 HANNI, C., BRADLEY, D. G. & LARSON, G. 2016. Genomic and archaeological  
1136 evidence suggest a dual origin of domestic dogs. *Science*, 352, 1228-31.  
1137 FREEDMAN, A. H., GRONAU, I., SCHWEIZER, R. M., ORTEGA-DEL VECCHYO, D., HAN, E.,  
1138 SILVA, P. M., GALAVERNI, M., FAN, Z., MARX, P., LORENTE-GALDOS, B., BEALE,  
1139 H., RAMIREZ, O., HORMOZDIARI, F., ALKAN, C., VILA, C., SQUIRE, K., GEFFEN, E.,  
1140 KUSAK, J., BOYKO, A. R., PARKER, H. G., LEE, C., TADIGOTLA, V., WILTON, A.,  
1141 SIEPEL, A., BUSTAMANTE, C. D., HARKINS, T. T., NELSON, S. F., OSTRANDER, E.  
1142 A., MARQUES-BONET, T., WAYNE, R. K. & NOVEMBRE, J. 2014. Genome  
1143 sequencing highlights the dynamic early history of dogs. *PLoS Genet*, 10, e1004016.  
1144 GHERNATI, I., CORBIN, A., CHABANNE, L., AUGER, C., MAGNOL, J. P., FOURNEL, C.,  
1145 MONIER, J. C., DARLIX, J. L. & RIGAL, D. 2000. Canine large granular lymphocyte  
1146 leukemia and its derived cell line produce infectious retroviral particles. *Vet Pathol*, 37,  
1147 310-7.  
1148 HALL, T. A. 1999. BioEdit: a user-friendly biological sequence alignment editor and analysis  
1149 program for Windows 95/98/NT. *Nucleic acids symposium series*, 41, 95-98.  
1150 HUANG, X. & MADAN, A. 1999. CAP3: A DNA sequence assembly program. *Genome Res*, 9,  
1151 868-77.  
1152 HUGHES, J. F. & COFFIN, J. M. 2004. Human endogenous retrovirus K solo-LTR formation  
1153 and insertional polymorphisms: implications for human and viral evolution. *Proc Natl*  
1154 *Acad Sci U S A*, 101, 1668-72.

- 1155 HUGHES, J. F. & COFFIN, J. M. 2005. Human endogenous retroviral elements as indicators of  
1156 ectopic recombination events in the primate genome. *Genetics*, 171, 1183-94.
- 1157 ISHIDA, Y., ZHAO, K., GREENWOOD, A. D. & ROCA, A. L. 2015. Proliferation of endogenous  
1158 retroviruses in the early stages of a host germ line invasion. *Mol Biol Evol*, 32, 109-20.
- 1159 JERN, P. & COFFIN, J. M. 2008. Effects of retroviruses on host genome function. *Annu Rev*  
1160 *Genet*, 42, 709-32.
- 1161 JO, H., CHOI, H., CHOI, M. K., SONG, N., KIM, J. H., OH, J. W., SEO, K., SEO, H. G., CHUN,  
1162 T., KIM, T. H. & PARK, C. 2012. Identification and classification of endogenous  
1163 retroviruses in the canine genome using degenerative PCR and in-silico data analysis.  
1164 *Virology*, 422, 195-204.
- 1165 JOHNSON, W. E. & COFFIN, J. M. 1999. Constructing primate phylogenies from ancient  
1166 retrovirus sequences. *Proc Natl Acad Sci* 96, 10254-10260.
- 1167 JURKA, J., KAPITONOV, V. V., PAVLICEK, A., KLONOWSKI, P., KOHANY, O. &  
1168 WALICHIEWICZ, J. 2005. Repbase Update, a database of eukaryotic repetitive  
1169 elements. *Cytogenet Genome Res*, 110, 462-7.
- 1170 KEANE, T. M., WONG, K. & ADAMS, D. J. 2013. RetroSeq: transposable element discovery  
1171 from next-generation sequencing data. *Bioinformatics*, 29, 389-90.
- 1172 KIM, H. M., CHO, Y. S., KIM, H., JHO, S., SON, B., CHOI, J. Y., KIM, S., LEE, B. C., BHAK, J.  
1173 & JANG, G. 2013. Whole genome comparison of donor and cloned dogs. *Sci Rep*, 3,  
1174 2998.
- 1175 KIM, R. N., KIM, D. S., CHOI, S. H., YOON, B. H., KANG, A., NAM, S. H., KIM, D. W., KIM, J.  
1176 J., HA, J. H., TOYODA, A., FUJIYAMA, A., KIM, A., KIM, M. Y., PARK, K. H., LEE, K. S.  
1177 & PARK, H. S. 2012. Genome analysis of the domestic dog (Korean Jindo) by massively  
1178 parallel sequencing. *DNA Res*, 19, 275-87.
- 1179 KINDBERG, E., HEJDEMAN, B., BRATT, G., WAHREN, B., LINDBLOM, B., HINKULA, J. &  
1180 SVENSSON, L. 2006. A nonsense mutation (428G-->A) in the fucosyltransferase FUT2  
1181 gene affects the progression of HIV-1 infection. *AIDS*, 20, 685-9.
- 1182 KOBLMÜLLER, S., VILÀ, C., LORENTE-GALDOS, B., DABAD, M., RAMIREZ, O., MARQUES-  
1183 BONET, T., WAYNE, R. K. & LEONARD, J. A. 2016. Whole mitochondrial genomes  
1184 illuminate ancient intercontinental dispersals of grey wolves (*Canis lupus*). *Journal of*  
1185 *Biogeography*, 43.
- 1186 KOEPLI, K. P., POLLINGER, J., GODINHO, R., ROBINSON, J., LEA, A., HENDRICKS, S.,  
1187 SCHWEIZER, R. M., THALMANN, O., SILVA, P., FAN, Z., YURCHENKO, A. A.,  
1188 DOBRYNIN, P., MAKUNIN, A., CAHILL, J. A., SHAPIRO, B., ALVARES, F., BRITO, J.  
1189 C., GEFFEN, E., LEONARD, J. A., HELGEN, K. M., JOHNSON, W. E., O'BRIEN, S. J.,  
1190 VAN VALKENBURGH, B. & WAYNE, R. K. 2015. Genome-wide Evidence Reveals that  
1191 African and Eurasian Golden Jackals Are Distinct Species. *Curr Biol*, 25, 2158-65.
- 1192 KUMAR, S., STECHER, G., SULESKI, M. & HEDGES, S. B. 2017. TimeTree: A Resource for  
1193 Timelines, Timetrees, and Divergence Times. *Molecular Biology and Evolution*, 34, 834-  
1194 845.
- 1195 KUMAR, S., STECHER, G. & TAMURA, K. 2016. MEGA7: Molecular Evolutionary Genetics  
1196 Analysis Version 7.0 for Bigger Datasets. *Mol Biol Evol*, 33, 1870-4.
- 1197 LAVIALLE, C., CORNELIS, G., DUPRESSOIR, A., ESNAULT, C., HEIDMANN, O.,  
1198 VERNOCHE, C. & HEIDMANN, T. 2013. Paleovirology of 'syncytins', retroviral env  
1199 genes exapted for a role in placentation. *Philos Trans R Soc Lond B Biol Sci*, 368,  
1200 20120507.
- 1201 LE PENDU, J., RUVOEN-CLOUET, N., KINDBERG, E. & SVENSSON, L. 2006. Mendelian  
1202 resistance to human norovirus infections. *Semin Immunol*, 18, 375-86.
- 1203 LI, H. 2011. A statistical framework for SNP calling, mutation discovery, association mapping  
1204 and population genetical parameter estimation from sequencing data. *Bioinformatics*, 27,  
1205 2987-93.

- 1206 LI, R., FAN, W., TIAN, G., ZHU, H., HE, L., CAI, J., HUANG, Q., CAI, Q., LI, B., BAI, Y.,  
1207 ZHANG, Z., ZHANG, Y., WANG, W., LI, J., WEI, F., LI, H., JIAN, M., LI, J., ZHANG, Z.,  
1208 NIELSEN, R., LI, D., GU, W., YANG, Z., XUAN, Z., RYDER, O. A., LEUNG, F. C.,  
1209 ZHOU, Y., CAO, J., SUN, X., FU, Y., FANG, X., GUO, X., WANG, B., HOU, R., SHEN,  
1210 F., MU, B., NI, P., LIN, R., QIAN, W., WANG, G., YU, C., NIE, W., WANG, J., WU, Z.,  
1211 LIANG, H., MIN, J., WU, Q., CHENG, S., RUAN, J., WANG, M., SHI, Z., WEN, M., LIU,  
1212 B., REN, X., ZHENG, H., DONG, D., COOK, K., SHAN, G., ZHANG, H., KOSIOL, C.,  
1213 XIE, X., LU, Z., ZHENG, H., LI, Y., STEINER, C. C., LAM, T. T., LIN, S., ZHANG, Q., LI,  
1214 G., TIAN, J., GONG, T., LIU, H., ZHANG, D., FANG, L., YE, C., ZHANG, J., HU, W., XU,  
1215 A., REN, Y., ZHANG, G., BRUFORD, M. W., LI, Q., MA, L., GUO, Y., AN, N., HU, Y.,  
1216 ZHENG, Y., SHI, Y., LI, Z., LIU, Q., CHEN, Y., ZHAO, J., QU, N., ZHAO, S., TIAN, F.,  
1217 WANG, X., WANG, H., XU, L., LIU, X., VINAR, T., et al. 2010. The sequence and de  
1218 novo assembly of the giant panda genome. *Nature*, 463, 311-7.
- 1219 LI, Y., WU, D. D., BOYKO, A. R., WANG, G. D., WU, S. F., IRWIN, D. M. & ZHANG, Y. P. 2014.  
1220 Population variation revealed high-altitude adaptation of Tibetan mastiffs. *Mol Biol Evol*,  
1221 31, 1200-5.
- 1222 LINDBLAD-TOH, K., WADE, C. M., MIKKELSEN, T. S., KARLSSON, E. K., JAFFE, D. B.,  
1223 KAMAL, M., CLAMP, M., CHANG, J. L., KULBOKAS, E. J., 3RD, ZODY, M. C.,  
1224 MAUCELI, E., XIE, X., BREEN, M., WAYNE, R. K., OSTRANDER, E. A., PONTING, C.  
1225 P., GALIBERT, F., SMITH, D. R., DEJONG, P. J., KIRKNESS, E., ALVAREZ, P., BIAGI,  
1226 T., BROCKMAN, W., BUTLER, J., CHIN, C. W., COOK, A., CUFF, J., DALY, M. J.,  
1227 DECAPRIO, D., GNERRE, S., GRABHERR, M., KELLIS, M., KLEBER, M.,  
1228 BARDELEBEN, C., GOODSTADT, L., HEGER, A., HITTE, C., KIM, L., KOEPLI, K. P.,  
1229 PARKER, H. G., POLLINGER, J. P., SEARLE, S. M., SUTTER, N. B., THOMAS, R.,  
1230 WEBBER, C., BALDWIN, J., ABEBE, A., ABOUELLEIL, A., AFTUCK, L., AIT-ZAHRA,  
1231 M., ALDREDGE, T., ALLEN, N., AN, P., ANDERSON, S., ANTOINE, C., ARACHCHI, H.,  
1232 ASLAM, A., AYOTTE, L., BACHANTSANG, P., BARRY, A., BAYUL, T., BENAMARA,  
1233 M., BERLIN, A., BESSETTE, D., BLITSHTEYN, B., BLOOM, T., BLYE, J.,  
1234 BOGUSLAVSKIY, L., BONNET, C., BOUKHGALTER, B., BROWN, A., CAHILL, P.,  
1235 CALIXTE, N., CAMARATA, J., CHESHATSANG, Y., CHU, J., CITROEN, M.,  
1236 COLLYMORE, A., COOKE, P., DAWOE, T., DAZA, R., DECKTOR, K., DEGRAY, S.,  
1237 DHARGAY, N., DOOLEY, K., DOOLEY, K., DORJE, P., DORJEE, K., DORRIS, L.,  
1238 DUFFEY, N., DUPES, A., EGBIREMOLEN, O., ELONG, R., FALK, J., FARINA, A.,  
1239 FARO, S., FERGUSON, D., FERREIRA, P., FISHER, S., FITZGERALD, M., et al. 2005.  
1240 Genome sequence, comparative analysis and haplotype structure of the domestic dog.  
1241 *Nature*, 438, 803-19.
- 1242 LIU, D., XIONG, H., ELLIS, A. E., NORTHRUP, N. C., RODRIGUEZ, C. O., JR., O'REGAN, R.  
1243 M., DALTON, S. & ZHAO, S. 2014. Molecular homology and difference between  
1244 spontaneous canine mammary cancer and human breast cancer. *Cancer Res*, 74, 5045-  
1245 56.
- 1246 LOBER, U., HOBBS, M., DAYARAM, A., TSANGARAS, K., JONES, K., ALQUEZAR-PLANAS,  
1247 D. E., ISHIDA, Y., MEERS, J., MAYER, J., QUEDENAU, C., CHEN, W., JOHNSON, R.  
1248 N., TIMMS, P., YOUNG, P. R., ROCA, A. L. & GREENWOOD, A. D. 2018. Degradation  
1249 and remobilization of endogenous retroviruses by recombination during the earliest  
1250 stages of a germ-line invasion. *Proc Natl Acad Sci U S A*.
- 1251 MACDONALD, D. W. & SILLERO-ZUBIRI, C. 2004. *The Biology and Conservation of Wild*  
1252 *Canids*, New York, Oxford University Press Inc.
- 1253 MACFARLAN, T. S., GIFFORD, W. D., DRISCOLL, S., LETTIERI, K., ROWE, H. M.,  
1254 BONANOMI, D., FIRTH, A., SINGER, O., TRONO, D. & PFAFF, S. L. 2012. Embryonic  
1255 stem cell potency fluctuates with endogenous retrovirus activity. *Nature*, 487, 57-63.

- 1256 MAGER, D. L. & STOYE, J. P. 2015. Mammalian Endogenous Retroviruses. *Microbiol Spectr*,  
1257 3, MDNA3-0009-2014.
- 1258 MAGIORKINIS, G., GIFFORD, R. J., KATZOURAKIS, A., DE RANTER, J. & BELSHAW, R.  
1259 2012. Env-less endogenous retroviruses are genomic superspreaders. *Proc Natl Acad*  
1260 *Sci U S A*, 109, 7385-90.
- 1261 MARSDEN, C. D., ORTEGA-DEL VECCHYO, D., O'BRIEN, D. P., TAYLOR, J. F., RAMIREZ,  
1262 O., VILA, C., MARQUES-BONET, T., SCHNABEL, R. D., WAYNE, R. K. &  
1263 LOHMUELLER, K. E. 2016. Bottlenecks and selective sweeps during domestication  
1264 have increased deleterious genetic variation in dogs. *Proc Natl Acad Sci U S A*, 113,  
1265 152-7.
- 1266 MARTINEZ BARRIO, A., EKERLJUNG, M., JERN, P., BENACHENHOU, F., SPERBER, G. O.,  
1267 BONGCAM-RUDLOFF, E., BLOMBERG, J. & ANDERSSON, G. 2011. The first  
1268 sequenced carnivore genome shows complex host-endogenous retrovirus relationships.  
1269 *PLoS One*, 6, e19832.
- 1270 MARUGGI, G., PORCELLINI, S., FACCHINI, G., PERNA, S. K., CATTOGLIO, C., SARTORI,  
1271 D., AMBROSI, A., SCHAMBACH, A., BAUM, C., BONINI, C., BOVOLENTA, C.,  
1272 MAVILIO, F. & RECCHIA, A. 2009. Transcriptional enhancers induce insertional gene  
1273 deregulation independently from the vector type and design. *Mol Ther*, 17, 851-6.
- 1274 MAYERS, J. R., TORRENCE, M. E., DANAI, L. V., PAPAGIANNAKOPOULOS, T., DAVIDSON,  
1275 S. M., BAUER, M. R., LAU, A. N., JI, B. W., DIXIT, P. D., HOSIOS, A. M., MUIR, A.,  
1276 CHIN, C. R., FREINKMAN, E., JACKS, T., WOLPIN, B. M., VITKUP, D. & VANDER  
1277 HEIDEN, M. G. 2016. Tissue of origin dictates branched-chain amino acid metabolism in  
1278 mutant Kras-driven cancers. *Science*, 353, 1161-5.
- 1279 MCKENNA, A., HANNA, M., BANKS, E., SIVACHENKO, A., CIBULSKIS, K., KERNYTSKY, A.,  
1280 GARIMELLA, K., ALTSHULER, D., GABRIEL, S., DALY, M. & DEPRISTO, M. A. 2010.  
1281 The Genome Analysis Toolkit: a MapReduce framework for analyzing next-generation  
1282 DNA sequencing data. *Genome Res*, 20, 1297-303.
- 1283 MODIANO, J. F., BREEN, M., BURNETT, R. C., PARKER, H. G., INUSAH, S., THOMAS, R.,  
1284 AVERY, P. R., LINDBLAD-TOH, K., OSTRANDER, E. A., CUTTER, G. C. & AVERY, A.  
1285 C. 2005. Distinct B-cell and T-cell lymphoproliferative disease prevalence among dog  
1286 breeds indicates heritable risk. *Cancer Res*, 65, 5654-61.
- 1287 MODIANO, J. F., GETZY, D. M., AKOL, K. G., VAN WINKLE, T. J. & COCKERELL, G. L. 1995.  
1288 Retrovirus-like activity in an immunosuppressed dog: pathological and immunological  
1289 findings. *J Comp Pathol*, 112, 165-83.
- 1290 NASCIMENTO, F. F. & RODRIGO, A. G. 2016. Computational Evaluation of the Strict Master  
1291 and Random Template Models of Endogenous Retrovirus Evolution. *PLoS One*, 11,  
1292 e0162454.
- 1293 NEI, M. & GOJOBORI, T. 1986. Simple methods for estimating the numbers of synonymous  
1294 and nonsynonymous nucleotide substitutions. *Mol Biol Evol*, 3, 418-26.
- 1295 NETHE, M., BERKHOUT, B. & VAN DER KUYL, A. C. 2005. Retroviral superinfection  
1296 resistance. *Retrovirology*, 2, 52.
- 1297 ONIONS, D. 1980. RNA-dependent DNA polymerase activity in canine lymphosarcoma. *Eur J*  
1298 *Cancer*, 16, 345-50.
- 1299 OSTERTAG, E. M. & KAZAZIAN, H. H., JR. 2001. Biology of mammalian L1 retrotransposons.  
1300 *Annu Rev Genet*, 35, 501-38.
- 1301 OWCZAREK-LIPSKA, M., JAGANNATHAN, V., DROGEMULLER, C., LUTZ, S., GLANEMANN,  
1302 B., LEEB, T. & KOOK, P. H. 2013. A frameshift mutation in the cubilin gene (CUBN) in  
1303 Border Collies with Imerslund-Grasbeck syndrome (selective cobalamin malabsorption).  
1304 *PLoS One*, 8, e61144.
- 1305 PARSONS, J. D. 1995. Miropeats: graphical DNA sequence comparisons. *Comput Appl Biosci*,  
1306 11, 615-9.

- 1307 PARSONS, W. H., KOLAR, M. J., KAMAT, S. S., COGNETTA, A. B., 3RD, HULCE, J. J., SAEZ,  
1308 E., KAHN, B. B., SAGHATELIAN, A. & CRAVATT, B. F. 2016. AIG1 and ADTRP are  
1309 atypical integral membrane hydrolases that degrade bioactive FAHFAs. *Nat Chem Biol*,  
1310 12, 367-372.
- 1311 PENDLETON, A. L., SHEN, F., TARAVELLA, A. M., EMERY, S., VEERAMAH, K. R., BOYKO,  
1312 A. R. & KIDD, J. M. 2018. Comparison of village dog and wolf genomes highlights the  
1313 role of the neural crest in dog domestication. *BMC Biol*, 16, 64.
- 1314 PENG, X., ALFOLDI, J., GORI, K., EISFELD, A. J., TYLER, S. R., TISONCIK-GO, J.,  
1315 BRAWAND, D., LAW, G. L., SKUNCA, N., HATTA, M., GASPER, D. J., KELLY, S. M.,  
1316 CHANG, J., THOMAS, M. J., JOHNSON, J., BERLIN, A. M., LARA, M., RUSSELL, P.,  
1317 SWOFFORD, R., TURNER-MAIER, J., YOUNG, S., HOURLIER, T., AKEN, B.,  
1318 SEARLE, S., SUN, X., YI, Y., SURESH, M., TUMPEY, T. M., SIEPEL, A., WISELY, S.  
1319 M., DESSIMOZ, C., KAWAOKA, Y., BIRREN, B. W., LINDBLAD-TOH, K., DI PALMA, F.,  
1320 ENGELHARDT, J. F., PALERMO, R. E. & KATZE, M. G. 2014. The draft genome  
1321 sequence of the ferret (*Mustela putorius furo*) facilitates study of human respiratory  
1322 disease. *Nat Biotechnol*, 32, 1250-5.
- 1323 PERK, K., SAFRAN, N. & DAHLBERG, J. E. 1992. Propagation and characterization of novel  
1324 canine lentivirus isolated from a dog. *Leukemia*, 6 Suppl 3, 155S-157S.
- 1325 PONTIUS, J. U., MULLIKIN, J. C., SMITH, D. R., AGENCOURT SEQUENCING, T., LINDBLAD-  
1326 TOH, K., GNERRE, S., CLAMP, M., CHANG, J., STEPHENS, R., NEELAM, B.,  
1327 VOLFOVSKY, N., SCHAFFER, A. A., AGARWALA, R., NARFSTROM, K., MURPHY, W.  
1328 J., GIGER, U., ROCA, A. L., ANTUNES, A., MENOTTI-RAYMOND, M., YUHKI, N.,  
1329 PECON-SLATTERY, J., JOHNSON, W. E., BOURQUE, G., TESLER, G., PROGRAM,  
1330 N. C. S. & O'BRIEN, S. J. 2007. Initial sequence and comparative analysis of the cat  
1331 genome. *Genome Res*, 17, 1675-89.
- 1332 PRICE, M. N., DEHAL, P. S. & ARKIN, A. P. 2010. FastTree 2--approximately maximum-  
1333 likelihood trees for large alignments. *PLoS One*, 5, e9490.
- 1334 PURCELL, S., NEALE, B., TODD-BROWN, K., THOMAS, L., FERREIRA, M. A., BENDER, D.,  
1335 MALLER, J., SKLAR, P., DE BAKKER, P. I., DALY, M. J. & SHAM, P. C. 2007. PLINK: a  
1336 tool set for whole-genome association and population-based linkage analyses. *Am J*  
1337 *Hum Genet*, 81, 559-75.
- 1338 QUINLAN, A. R. 2014. BEDTools: The Swiss-Army Tool for Genome Feature Analysis. *Curr*  
1339 *Protoc Bioinformatics*, 47, 11 12 1-34.
- 1340 RAUSCH, T., ZICHNER, T., SCHLATTL, A., STUTZ, A. M., BENES, V. & KORBEL, J. O. 2012.  
1341 DELLY: structural variant discovery by integrated paired-end and split-read analysis.  
1342 *Bioinformatics*, 28, i333-i339.
- 1343 REBOLLO, R., ROMANISH, M. T. & MAGER, D. L. 2012. Transposable elements: an abundant  
1344 and natural source of regulatory sequences for host genes. *Annu Rev Genet*, 46, 21-42.
- 1345 ROBINSON, J. A., ORTEGA-DEL VECCHYO, D., FAN, Z., KIM, B. Y., VONHOLDT, B. M.,  
1346 MARSDEN, C. D., LOHMUELLER, K. E. & WAYNE, R. K. 2016. Genomic Flatlining in  
1347 the Endangered Island Fox. *Curr Biol*, 26, 1183-9.
- 1348 ROCA, A. L., PECON-SLATTERY, J. & O'BRIEN, S. J. 2004. Genomically intact endogenous  
1349 feline leukemia viruses of recent origin. *J Virol*, 78, 4370-5.
- 1350 SAFRAN, N., PERK, K., EYAL, O. & DAHLBERG, J. E. 1992. Isolation and preliminary  
1351 characterisation of a novel retrovirus isolated from a leukaemic dog. *Res Vet Sci*, 52,  
1352 250-5.
- 1353 SAWYER, S. L., EMERMAN, M. & MALIK, H. S. 2007. Discordant evolution of the adjacent  
1354 antiretroviral genes TRIM22 and TRIM5 in mammals. *PLoS Pathog*, 3, e197.
- 1355 SINHA, A. & JOHNSON, W. E. 2017. Retroviruses of the RDR superinfection interference  
1356 group: ancient origins and broad host distribution of a promiscuous Env gene. *Curr Opin*  
1357 *Virol*, 25, 105-112.

- 1358 SKOGLUND, P., ERSMARK, E., PALKOPOULOU, E. & DALEN, L. 2015. Ancient wolf genome  
1359 reveals an early divergence of domestic dog ancestors and admixture into high-latitude  
1360 breeds. *Curr Biol*, 25, 1515-9.
- 1361 STANKIEWICZ, P. & LUPSKI, J. R. 2002. Molecular-evolutionary mechanisms for genomic  
1362 disorders. *Curr Opin Genet Dev*, 12, 312-9.
- 1363 STOCKING, C. & KOZAK, C. A. 2008. Murine endogenous retroviruses. *Cell Mol Life Sci*, 65,  
1364 3383-98.
- 1365 STOYE, J. P. 2012. Studies of endogenous retroviruses reveal a continuing evolutionary saga.  
1366 *Nat Rev Microbiol*, 10, 395-406.
- 1367 TARLINTON, R. E., BARFOOT, H. K., ALLEN, C. E., BROWN, K., GIFFORD, R. J. & EMES, R.  
1368 D. 2013. Characterisation of a group of endogenous gammaretroviruses in the canine  
1369 genome. *Vet J*, 196, 28-33.
- 1370 TARLINTON, R. E., MEERS, J. & YOUNG, P. R. 2006. Retroviral invasion of the koala genome.  
1371 *Nature*, 442, 79-81.
- 1372 THORVEN, M., GRAHN, A., HEDLUND, K. O., JOHANSSON, H., WAHLFRID, C., LARSON, G.  
1373 & SVENSSON, L. 2005. A homozygous nonsense mutation (428G-->A) in the human  
1374 secretor (FUT2) gene provides resistance to symptomatic norovirus (GGII) infections. *J*  
1375 *Virology*, 79, 15351-5.
- 1376 TOMLEY, F. M., ARMSTRONG, S. J., MAHY, B. W. & OWEN, L. N. 1983. Reverse  
1377 transcriptase activity and particles of retroviral density in cultured canine lymphosarcoma  
1378 supernatants. *Br J Cancer*, 47, 277-84.
- 1379 TROYER, J. L., PECON-SLATTERY, J., ROELKE, M. E., BLACK, L., PACKER, C. & O'BRIEN,  
1380 S. J. 2004. Patterns of feline immunodeficiency virus multiple infection and genome  
1381 divergence in a free-ranging population of African lions. *J Virology*, 78, 3777-91.
- 1382 VAMATHEVAN, J. J., HALL, M. D., HASAN, S., WOOLLARD, P. M., XU, M., YANG, Y., LI, X.,  
1383 WANG, X., KENNY, S., BROWN, J. R., HUXLEY-JONES, J., LYON, J., HASELDEN, J.,  
1384 MIN, J. & SANSEAU, P. 2013. Minipig and beagle animal model genomes aid species  
1385 selection in pharmaceutical discovery and development. *Toxicol Appl Pharmacol*, 270,  
1386 149-57.
- 1387 WANG, G. D., ZHAI, W., YANG, H. C., FAN, R. X., CAO, X., ZHONG, L., WANG, L., LIU, F.,  
1388 WU, H., CHENG, L. G., POYARKOV, A. D., POYARKOV, N. A., JR., TANG, S. S.,  
1389 ZHAO, W. M., GAO, Y., LV, X. M., IRWIN, D. M., SAVOLAINEN, P., WU, C. I. &  
1390 ZHANG, Y. P. 2013. The genomics of selection in dogs and the parallel evolution  
1391 between dogs and humans. *Nat Commun*, 4, 1860.
- 1392 WANG, G. D., ZHAI, W., YANG, H. C., WANG, L., ZHONG, L., LIU, Y. H., FAN, R. X., YIN, T.  
1393 T., ZHU, C. L., POYARKOV, A. D., IRWIN, D. M., HYTONEN, M. K., LOHI, H., WU, C. I.,  
1394 SAVOLAINEN, P. & ZHANG, Y. P. 2016. Out of southern East Asia: the natural history  
1395 of domestic dogs across the world. *Cell Res*, 26, 21-33.
- 1396 WANG, X. & TEDFORD, R. H. 2008. *DOGS: Their fossil relatives and evolutionary history*, New  
1397 York Chichester, West Sussex, Columbia University Press.
- 1398 WEISS, R. A. & STOYE, J. P. 2013. Virology. Our viral inheritance. *Science*, 340, 820-1.
- 1399 WILDSCHUTTE, J. H., BARON, A., DIROFF, N. M. & KIDD, J. M. 2015. Discovery and  
1400 characterization of Alu repeat sequences via precise local read assembly. *Nucleic Acids*  
1401 *Res*, 43, 10292-307.
- 1402 WILDSCHUTTE, J. H., WILLIAMS, Z. H., MONTESION, M., SUBRAMANIAN, R. P., KIDD, J. M.  
1403 & COFFIN, J. M. 2016. Discovery of unfixed endogenous retrovirus insertions in diverse  
1404 human populations. *Proc Natl Acad Sci U S A*, 113, E2326-34.
- 1405 XU, B. & YANG, Z. 2013. PAMLX: a graphical user interface for PAML. *Mol Biol Evol*, 30, 2723-  
1406 4.
- 1407 YAN, J., CHEN, G., ZHAO, X., CHEN, F., WANG, T. & MIAO, F. 2018. High expression of  
1408 diffuse panbronchiolitis critical region 1 gene promotes cell proliferation, migration and



1409 invasion in pancreatic ductal adenocarcinoma. *Biochem Biophys Res Commun*, 495,  
1410 1908-1914.  
1411 YOUNG, G. R., EKSMOND, U., SALCEDO, R., ALEXOPOULOU, L., STOYE, J. P. &  
1412 KASSIOTIS, G. 2012. Resurrection of endogenous retroviruses in antibody-deficient  
1413 mice. *Nature*, 491, 774-8.  
1414 ZHANG, W., FAN, Z., HAN, E., HOU, R., ZHANG, L., GALAVERNI, M., HUANG, J., LIU, H.,  
1415 SILVA, P., LI, P., POLLINGER, J. P., DU, L., ZHANG, X., YUE, B., WAYNE, R. K. &  
1416 ZHANG, Z. 2014. Hypoxia adaptations in the grey wolf (*Canis lupus chanco*) from  
1417 Qinghai-Tibet Plateau. *PLoS Genet*, 10, e1004466.  
1418  
1419  
1420

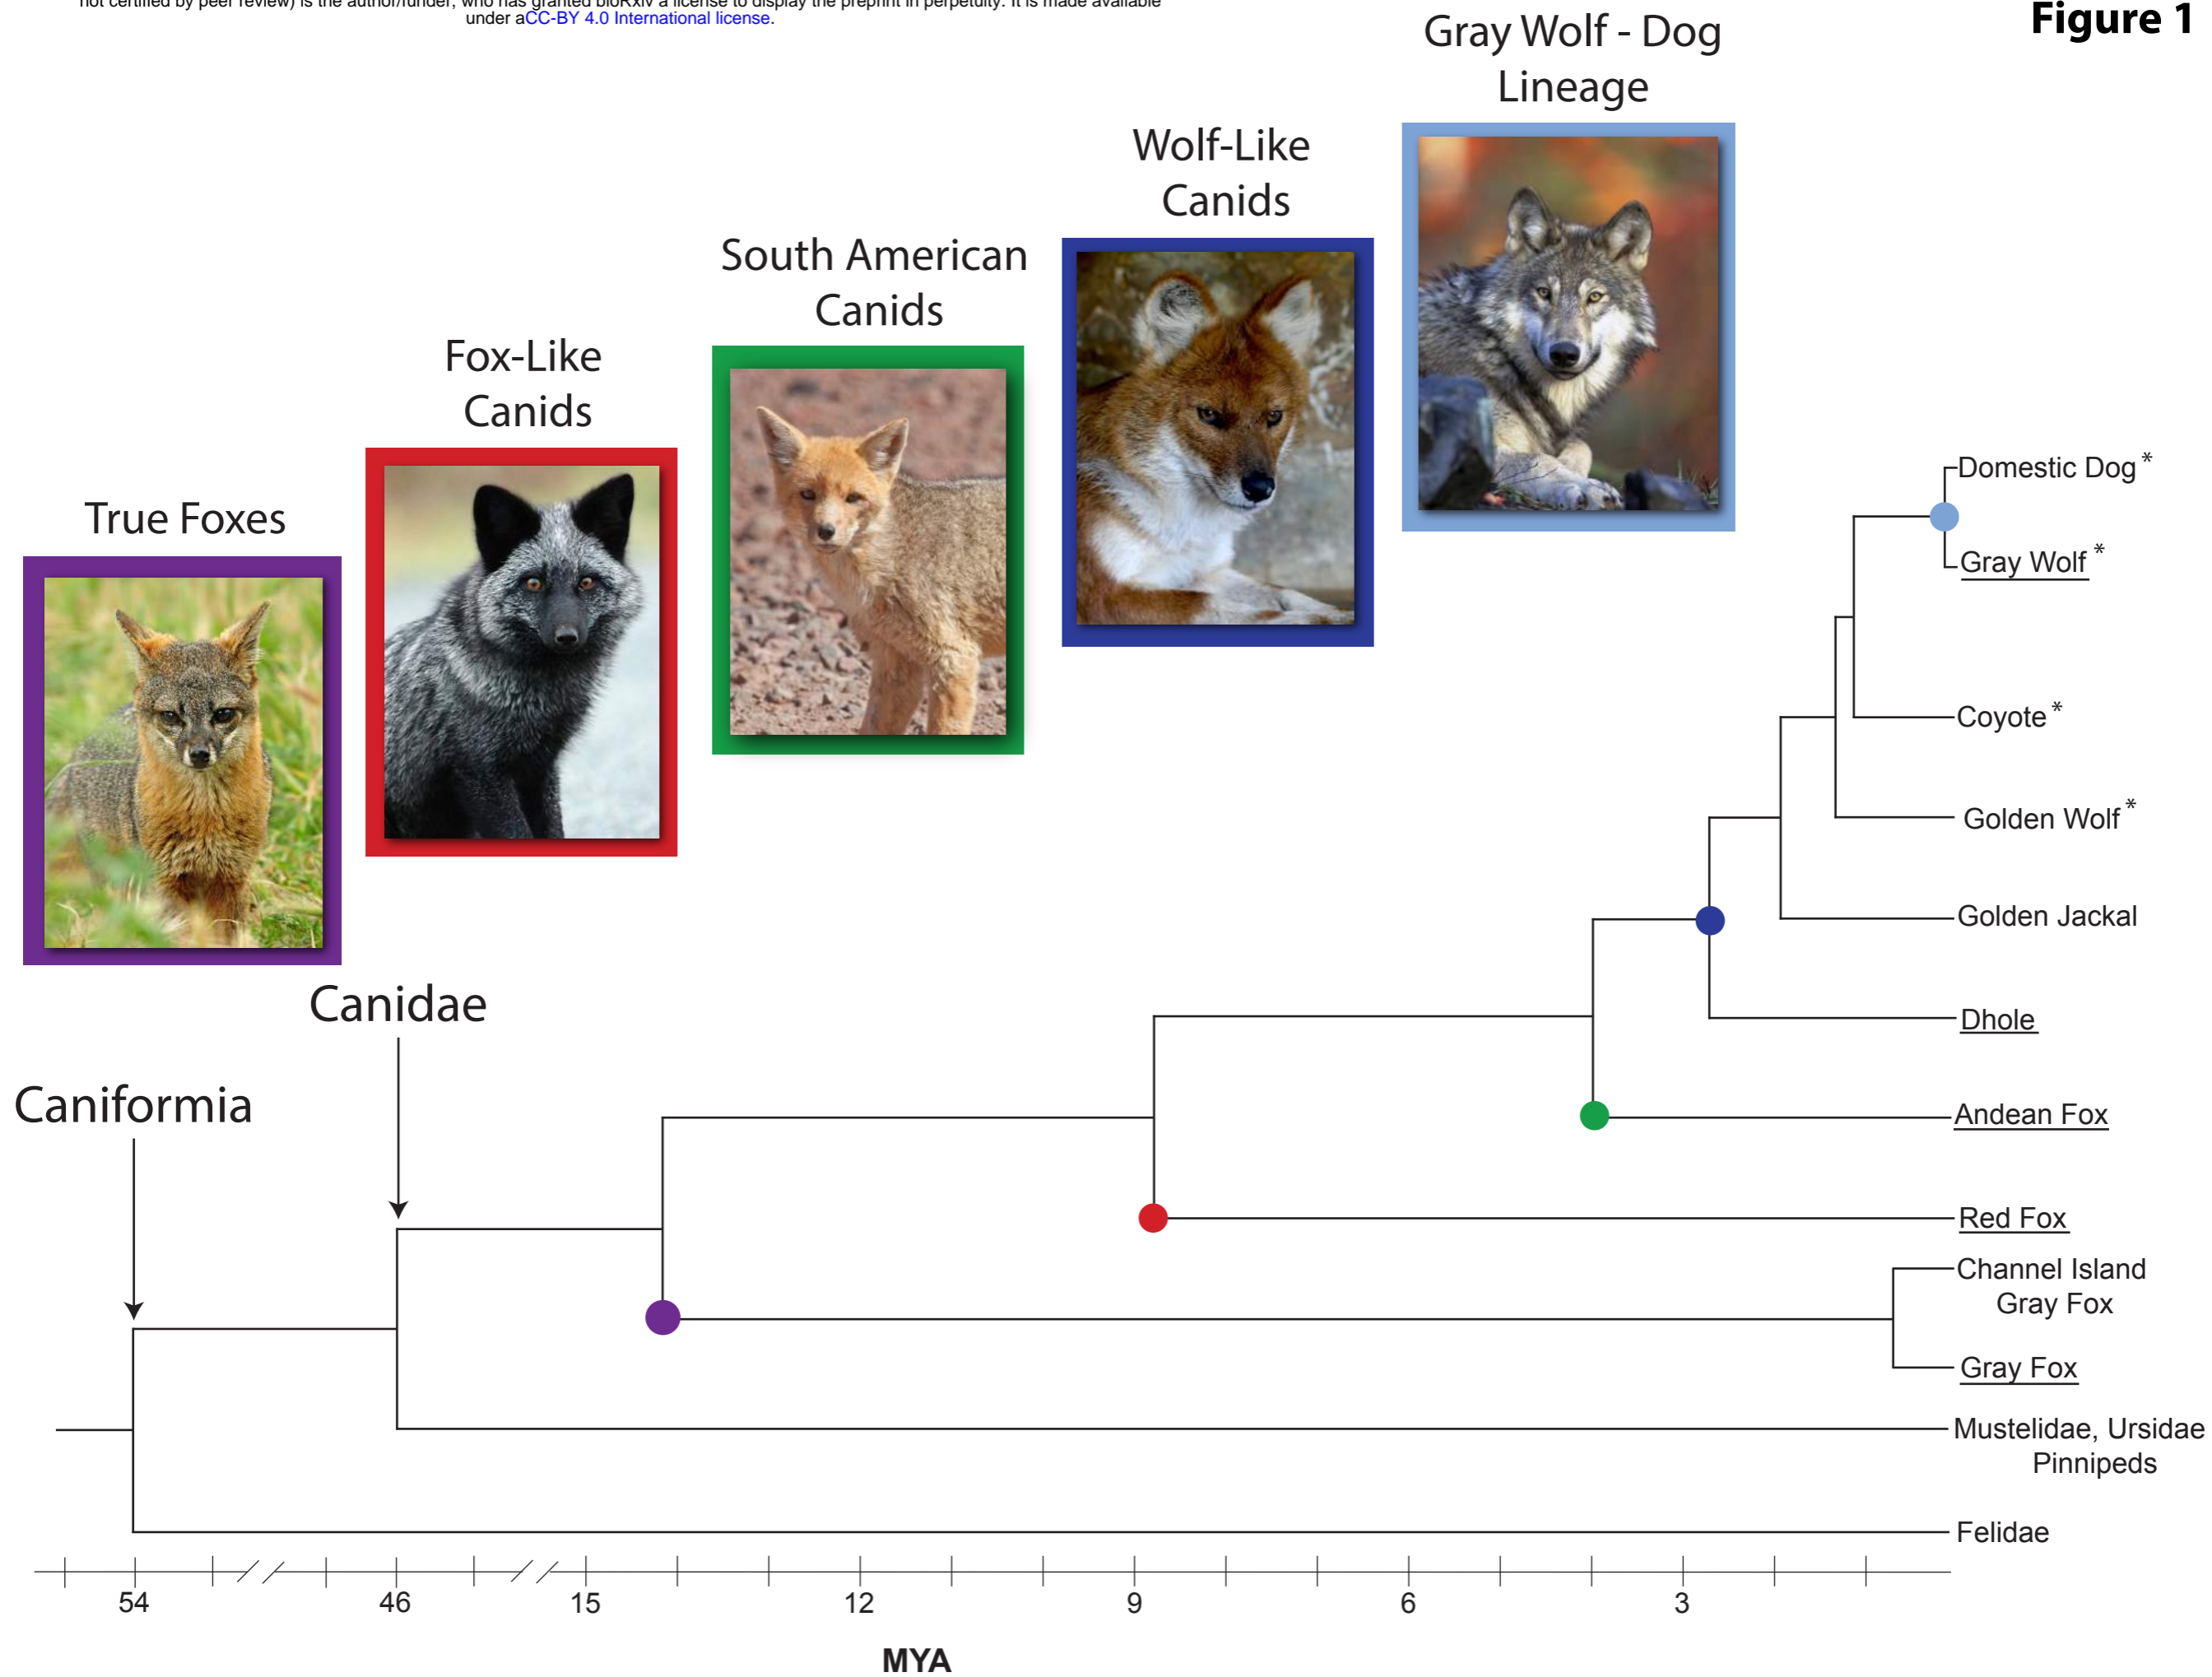

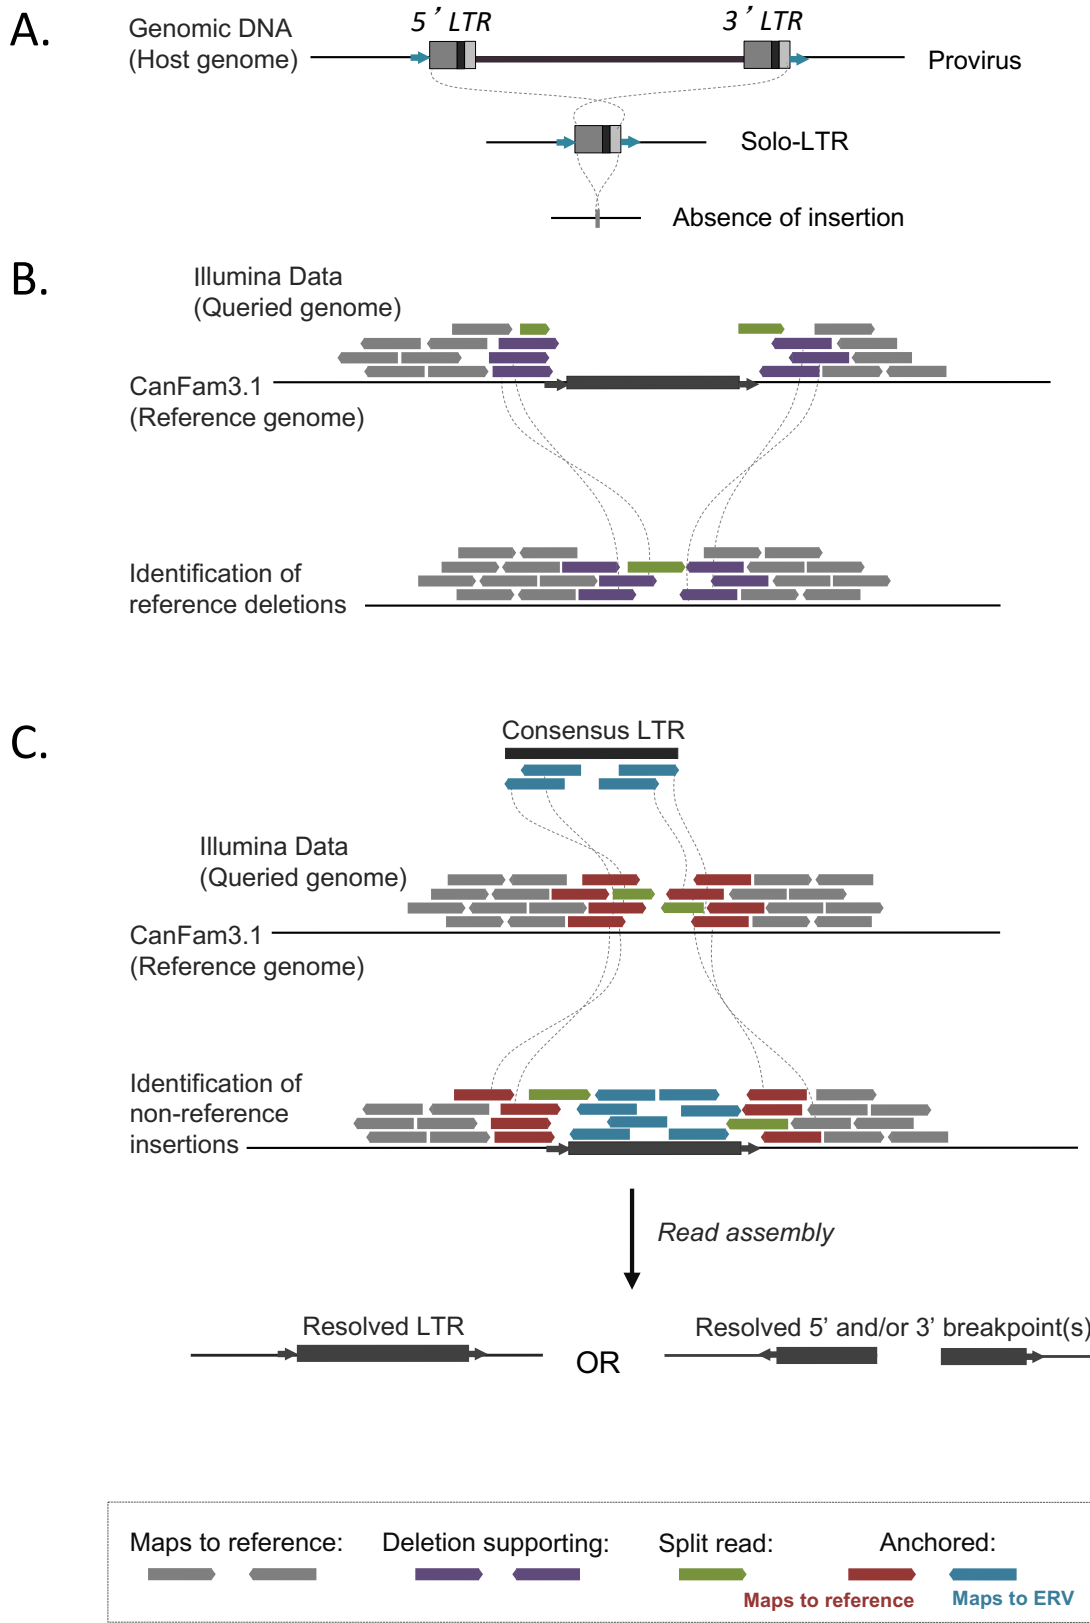

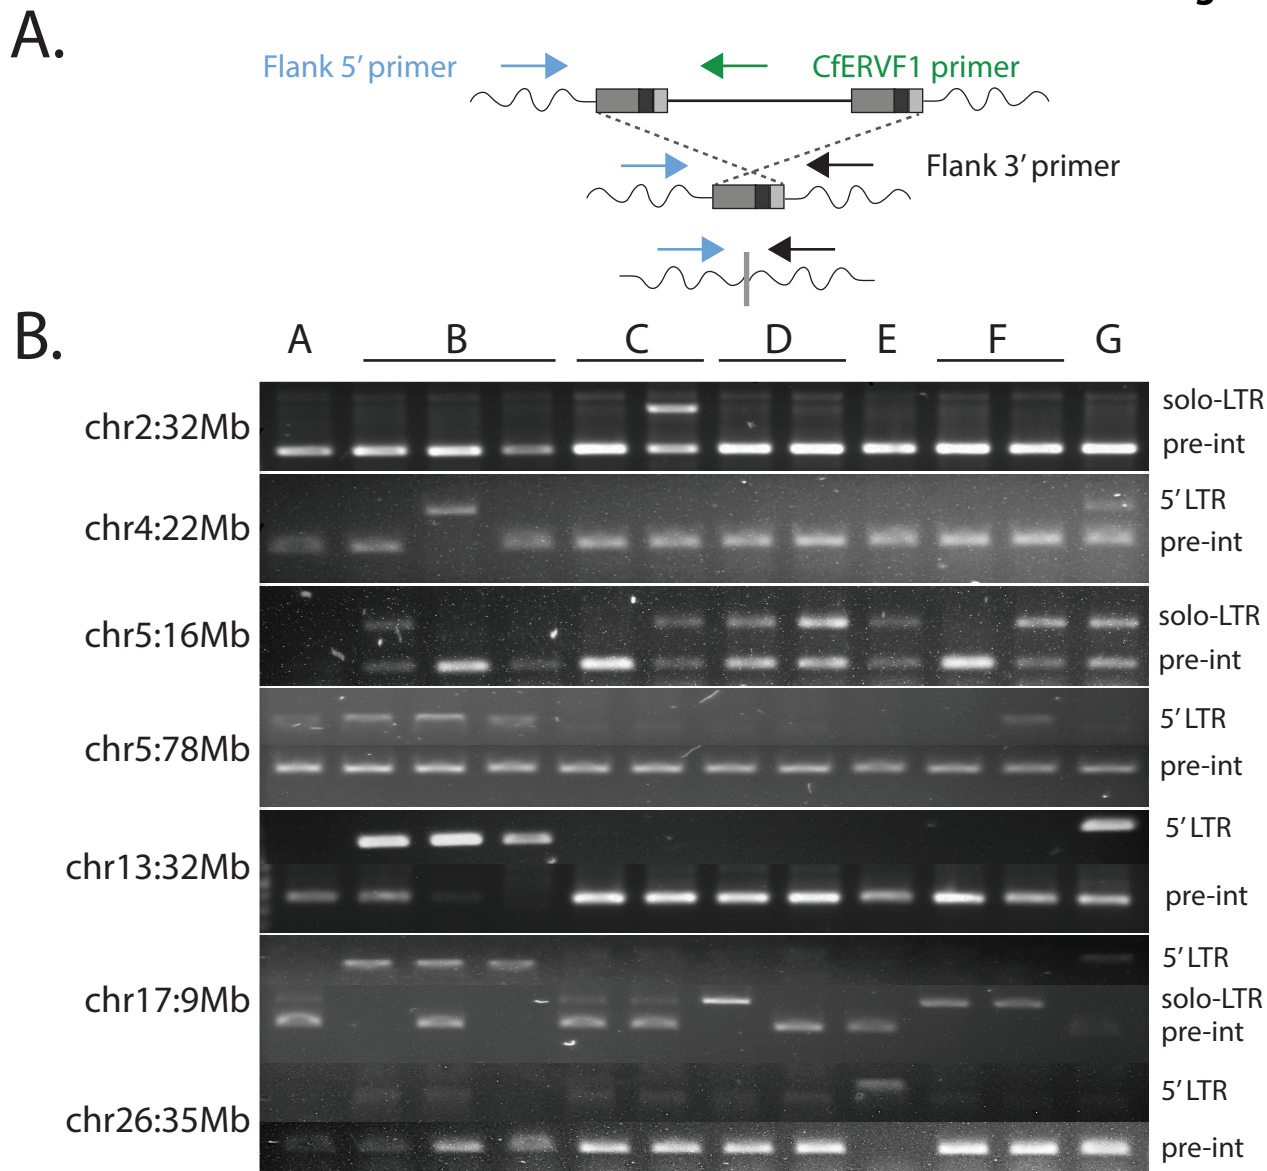

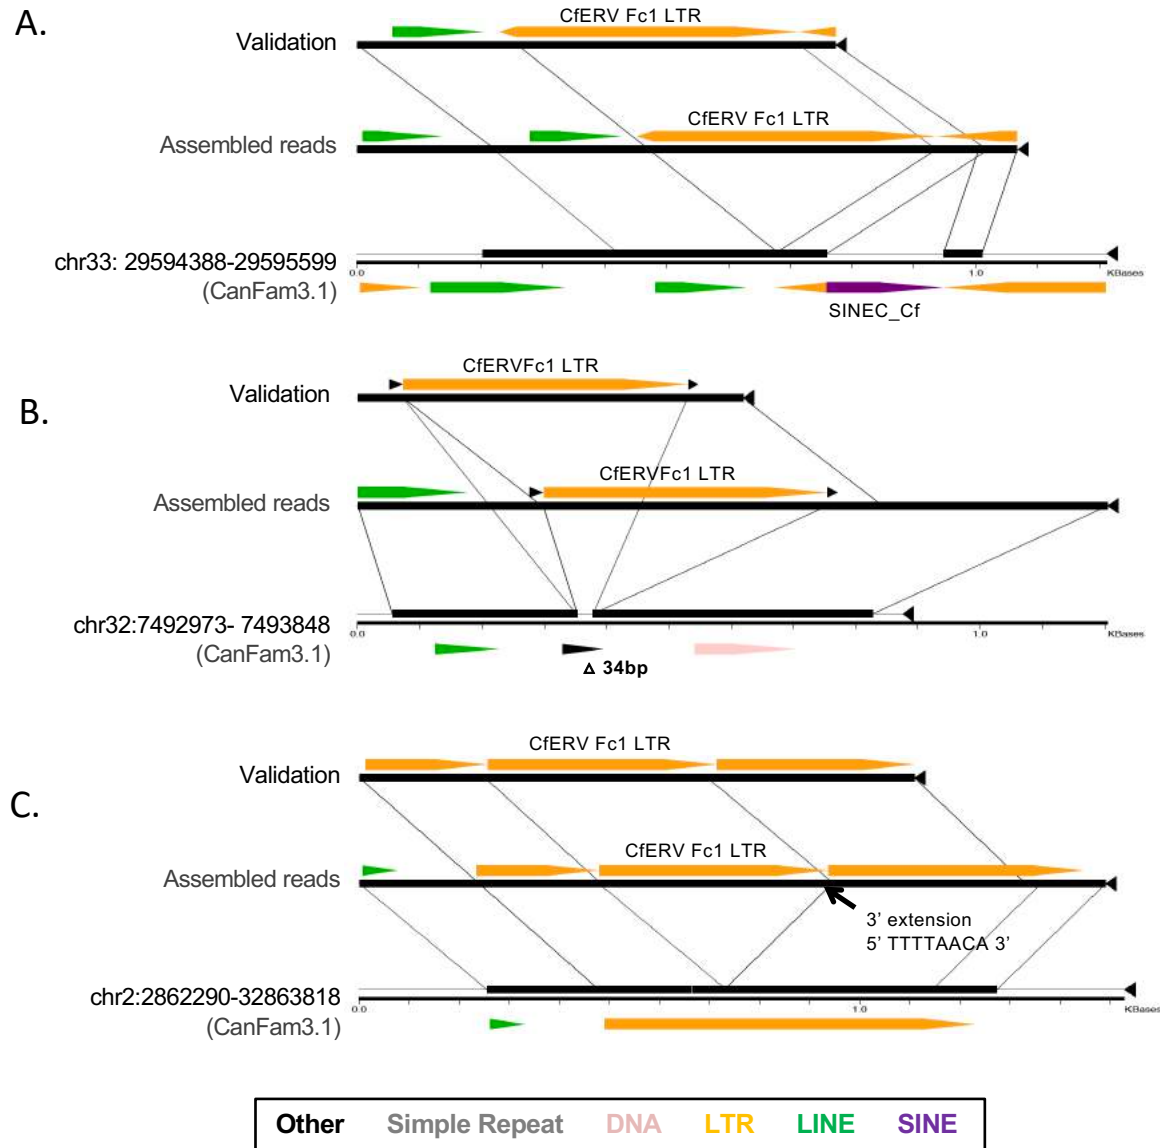

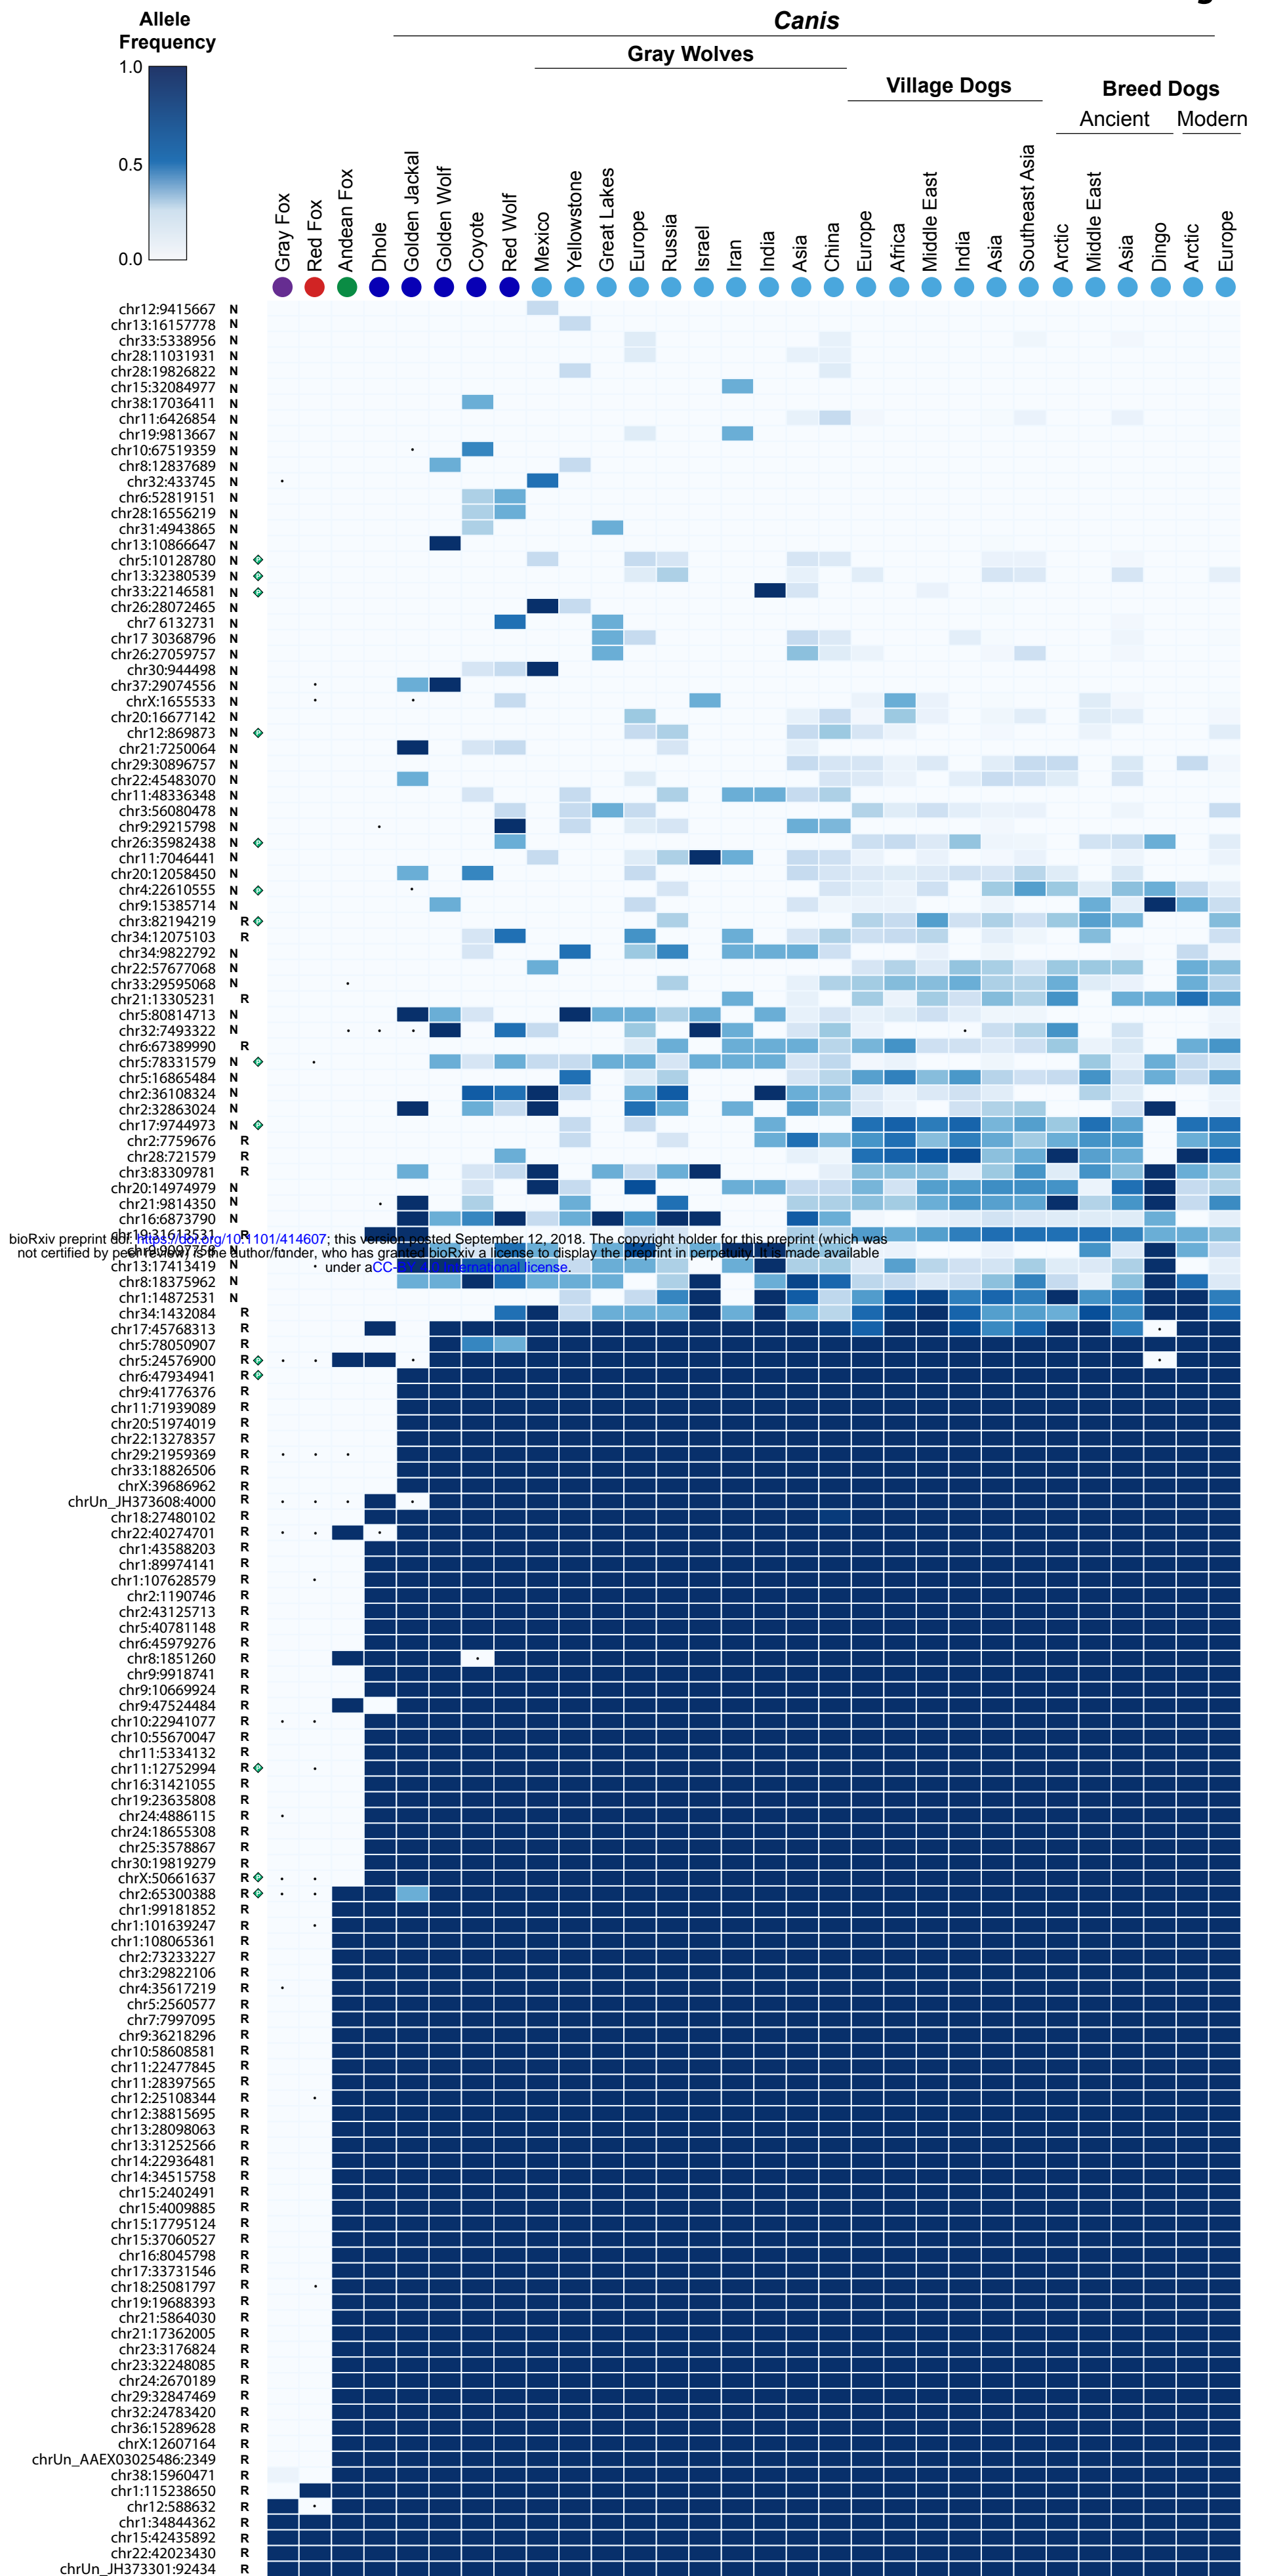

bioRxiv preprint doi: <https://doi.org/10.1101/414607>; this version posted September 12, 2018. The copyright holder for this preprint (which was not certified by peer review) is the author/funder, who has granted bioRxiv a license to display the preprint in perpetuity. It is made available under aCC-BY 4.0 International license.

bioRxiv preprint doi: <https://doi.org/10.1101/414607>; this version posted September 12, 2018. The copyright holder for this preprint (which was not certified by peer review) is the author/funder, who has granted bioRxiv a license to display the preprint in perpetuity. It is made available under aCC-BY 4.0 International license.

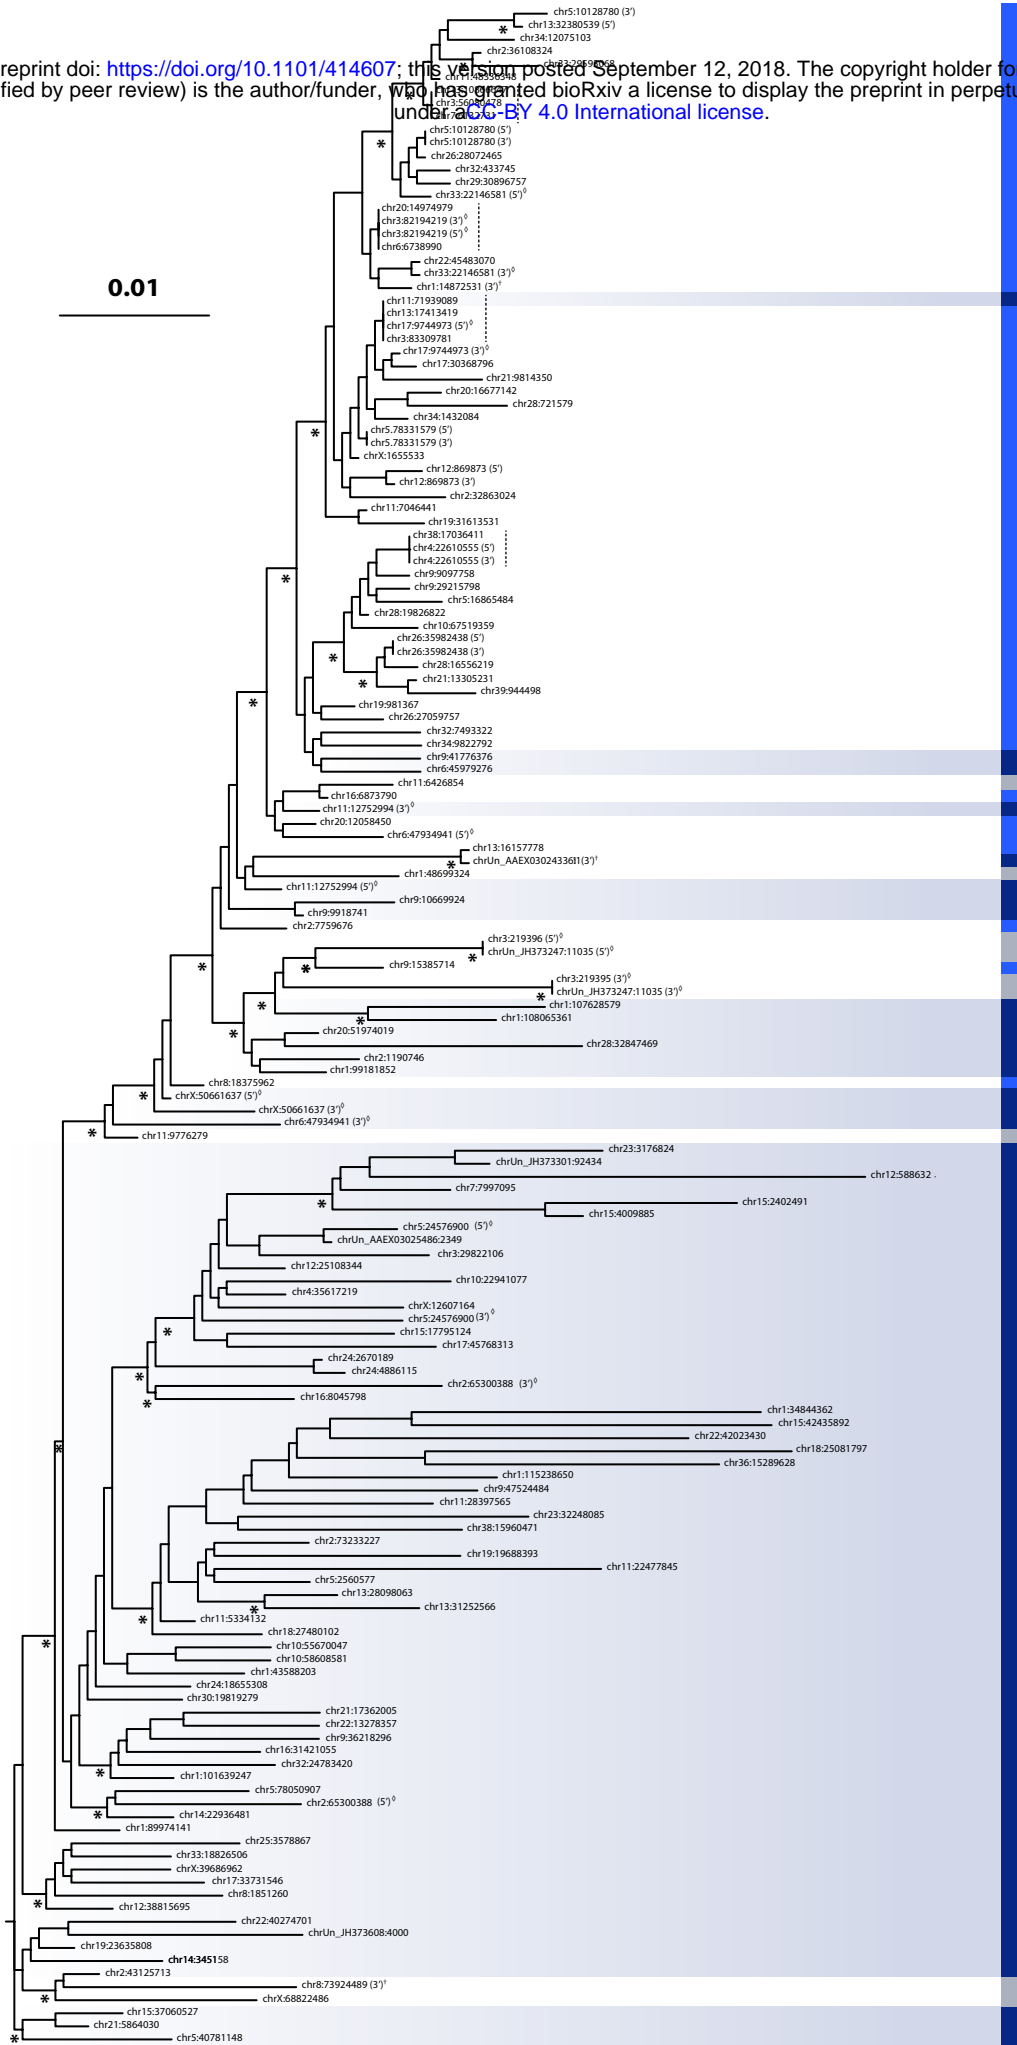

A.

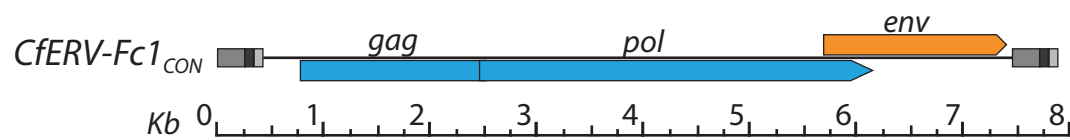

B.

**Non-reference**  
proviral Fc1(a)  
insertions

Unfixed in *Canis*<sup>†</sup>

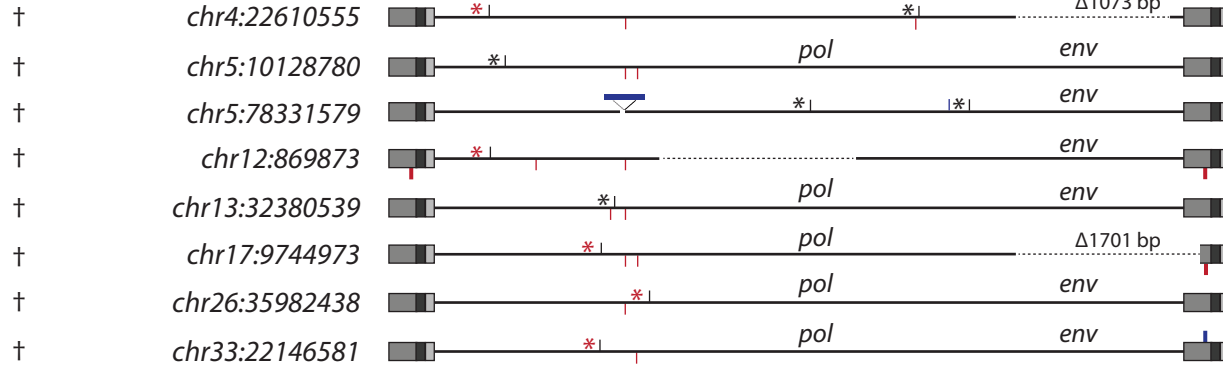

**Reference**  
(CanFam3.1)  
proviral Fc1(a)  
insertions

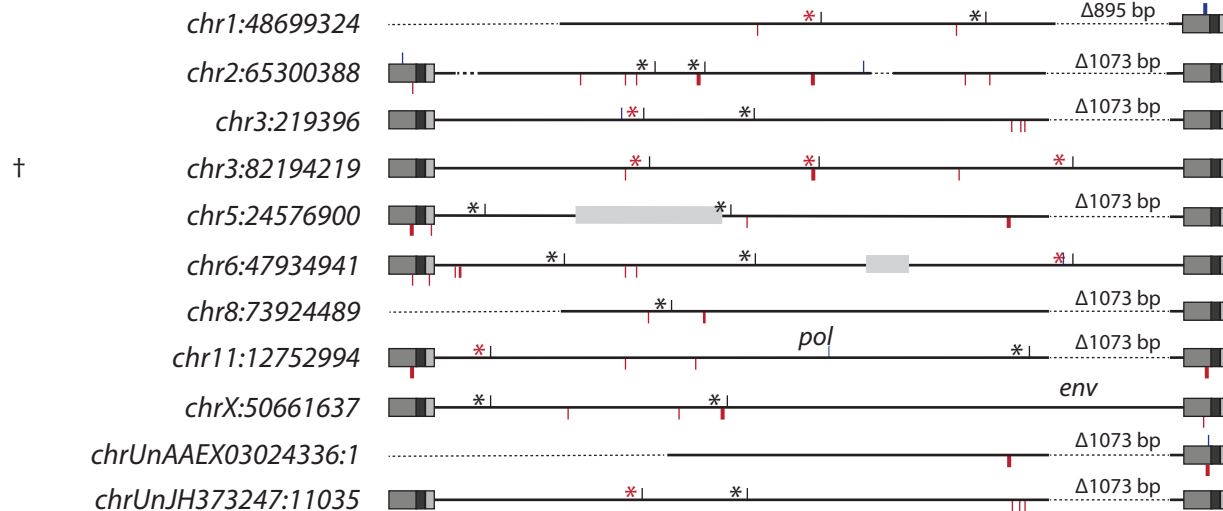

5'LTR-3'LTR  
changes

Estimated T.O.F.  
(mya)

|      |        |
|------|--------|
| 0    | <1.64  |
| 0    | <1.64  |
| 0    | <1.64  |
| 1    | ~1.81  |
| 1    | ~1.64  |
| n.a. | n.a.   |
| 0    | <1.64  |
| 4    | ~6.58  |
| n.a. | n.a.   |
| 13   | ~20.49 |
| 12   | ~19.74 |
| 0    | <1.64  |
| 9    | ~14.80 |
| 10   | ~16.52 |
| n.a. | n.a.   |
| 3    | ~4.94  |
| 4    | ~6.62  |
| n.a. | n.a.   |
| 12   | ~19.74 |



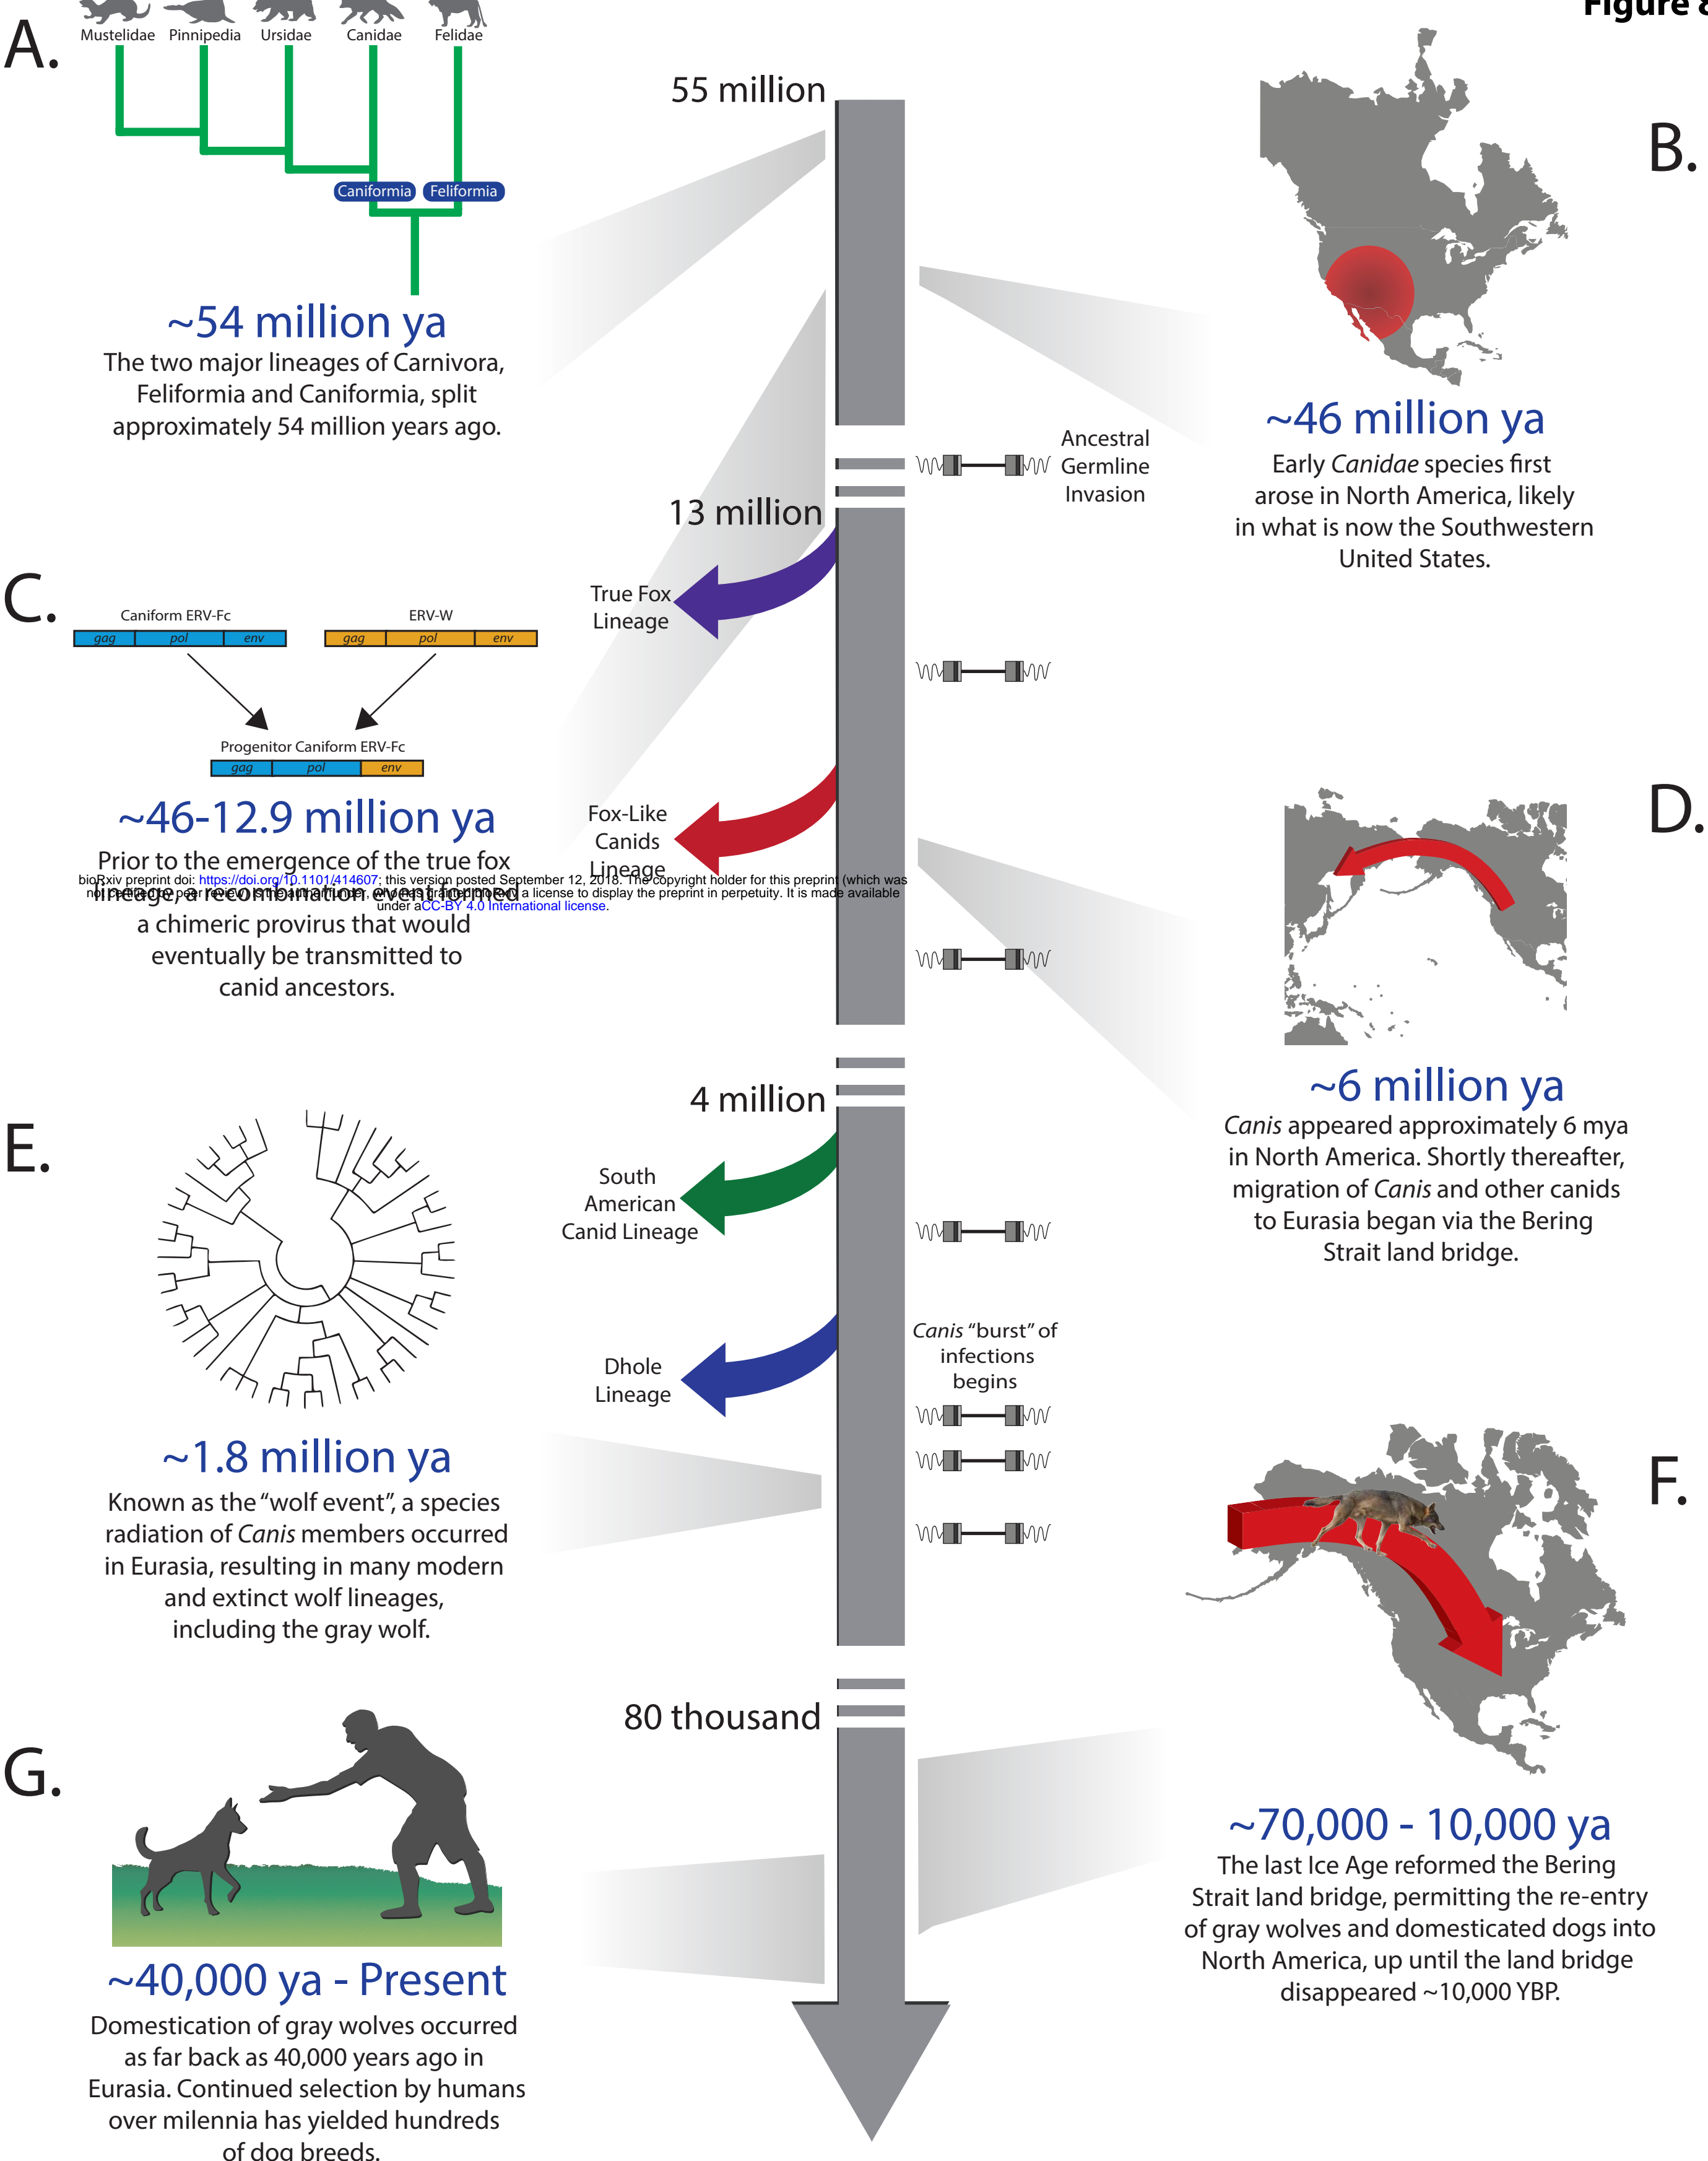

Source: http://biorxiv.org/content/10.1101/414607v1.full.pdf
